# Supplementary material for: On the Role of Light and Mixing in Shaping Southwestern Atlantic Shelf Blooms
Source: Copernicus journal article supplement (doi:10.5194/egusphere-2025-2033), 2025-06-26
Supplement: Supplementary file [file egusphere-2025-2033-RC1-supplement.pdf]

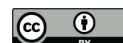

# On the Role of Light and Mixing in Shaping Southwestern Atlantic Shelf Blooms

Ana I. Dogliotti<sup>1,2</sup>, Reinaldo A. Maenza<sup>3</sup>, Moira Luz Clara<sup>3,4</sup>, Vivian A. Lutz<sup>3,4</sup>, and Robert Frouin<sup>5</sup>

<sup>1</sup> Instituto de Astronomía y Física del Espacio (IAFE), Consejo Nacional de Investigaciones Científicas y Técnicas (CONICET) - Universidad de Buenos Aires (UBA), Ciudad Autónoma de Buenos Aires, C1428ZAA, Argentina.

<sup>2</sup> Instituto Franco-Argentino para el Estudio del Clima y sus Impactos (UMI-IFAECI, CNRS CONICET-UBA), Buenos Aires, C1428EGA, Argentina.

<sup>3</sup> Instituto Nacional de Investigación y Desarrollo Pesquero (INIDEP), Paseo Victoria Ocampo N°1, Escollera Norte (B7602HSA), Mar del Plata, B7602HSA, Argentina

<sup>4</sup> Instituto de Investigaciones Marinas y Costeras (IIMYC), Facultad de Ciencias Exactas y Naturales, Universidad Nacional de Mar del Plata (UNMDP), Consejo Nacional de Investigaciones Científicas y Técnicas (CONICET), CC 1260 (7600), Mar del Plata, B7600, Argentina

<sup>5</sup> Scripps Institution of Oceanography, University of California, San Diego, La Jolla, California 92037, United States

Correspondence to: Robert Frouin ([rfrouin@ucsd.edu](mailto:rfrouin@ucsd.edu))

**Abstract.** The influence of light availability and mixed layer depth (MLD) on phytoplankton bloom dynamics was examined across the Argentine Continental Shelf in the Southwest Atlantic Ocean (SWAO). Using satellite-derived chlorophyll-a concentration, photosynthetically available radiation, and euphotic depth ( $Z_{eu}$ ) data, combined with reanalysis products for MLD and wind fields, the spatial and temporal variability of key phenological parameters was analyzed, including bloom initiation, peak timing, and bloom intensity, over the 1998–2019 period. Distinct geographic trends in bloom dynamics were observed. In the Central Shelf (CS), blooms typically initiate (May–August) and peak (September–November) relatively early which correlated with shallow MLDs and increasing light, while coastal areas showed even earlier initiation (April) due to highly variable environmental conditions. In turn, the Patagonian Shelf (PS) experienced delayed initiation (September onwards) and peaks (December–January) due to deeper MLDs and colder Subantarctic waters. Bloom intensity also exhibited spatial variability, with the highest values observed in the southern PS and regions influenced by frontal systems, where nutrient-rich upwelling and favorable light conditions enhanced phytoplankton growth. Statistical modeling revealed that light penetration ( $Z_{eu}$ ) and its interplay with mixing ( $Z_{eu}$ :MLD ratio) were the strongest predictors of bloom anomalies at most sites. However, the predictive power of these relationships varied in regions influenced by local processes, like tidal mixing or frontal zones. Predictive models need to be integrated with regional oceanographic features to improve assessments of bloom phenology and primary production in such highly variable shelf ecosystems.

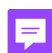

## 1 Introduction

The Earth's oceans are dynamic ecosystems influenced by many factors, including solar irradiance, nutrient availability, trophic interactions, and physical processes such as mixing and stratification. Among these factors, the light field and the mixed layer depth (MLD) play crucial roles in shaping the distribution and abundance of phytoplankton, the primary producers at the base of marine food webs (Cullen, 2015; Margalef, 1978; Platt et al., 2005; Richardson and Bendtsen, 2019; Sverdrup, 1953).

Understanding the effects of these variables is essential for predicting changes in marine ecosystems, particularly in the context of ongoing global change.

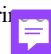

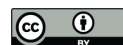

One of the key drivers of change is the alteration in wind patterns, which influence MLD through their impact on ocean mixing. Additionally, changes in cloud cover affect the amount of solar radiation reaching the ocean surface, directly influencing primary production. These shifts in environmental conditions have profound implications for phytoplankton distribution and abundance, with cascading effects on marine trophic webs and the global carbon cycle (Behrenfeld et al., 2006; Boyd and Doney, 2002; Falkowski et al., 1998).

The light field through the effect of both incident irradiance in the photosynthetically available region (hereafter ~~to as~~ PAR), which determines the energy available for photosynthesis, and the light penetration into the water column, represented by the euphotic zone depth ( $Z_{eu}$ ) governs the vertical extent of the habitat accessible to phytoplankton (Behrenfeld and Falkowski, 1997; Platt, 1986). Nutrient availability, particularly nitrogen, phosphorus, and iron, is another critical factor limiting phytoplankton growth in many regions of the ocean (e.g., Moore et al., 2013).

Historically, the understanding of phytoplankton dynamics has been framed by conceptual models such as those proposed by Sverdrup (1953) and Margalef (1978). These models provide qualitative explanations for the mechanisms driving phytoplankton blooms, emphasizing the role of physical processes, like the stability/mixing of the water column, in modulating light and nutrient availability. However, while these conceptual frameworks offer valuable insights, there is a need to develop a way to predict the response of phytoplankton communities to changing environmental conditions.

Recent studies have sought to bridge this gap by incorporating quantitative approaches to assess the relative importance of light (PAR and  $Z_{eu}$ ) and MLD in determining the timing and intensity of phytoplankton blooms. For instance, Siegel et al. (2002) examined the relationship between phytoplankton bloom dynamics and Sverdrup's Critical Depth Hypothesis in the North Atlantic. They analyzed satellite-derived data and in situ data (reanalysis) to investigate the timing and intensity of the spring phytoplankton bloom in relation to water column stability and light availability, providing evidence supporting Sverdrup's hypothesis. Henson et al. (2009), using satellite chlorophyll and a set of modeled variables, investigated decadal variability in North Atlantic phytoplankton blooms, identifying a strong relationship between changes in MLD, due to shifts in the North Atlantic Oscillation index, and the timing of bloom events, with shallower MLDs coinciding with earlier blooms. This study highlighted the complex interplay between physical processes and biological responses in shaping phytoplankton dynamics on decadal time scales. Platt et al. (2009) investigated the phenology of phytoplankton blooms using remote sensing data. They identified distinct patterns in bloom timing and intensity, correlating with environmental factors like light availability and nutrient concentrations. This research established ecosystem indicators based on bloom dynamics, demonstrating the utility of remote sensing in monitoring and understanding phytoplankton ecology. Marinov et al. (2010) modeled the response of ocean phytoplankton community structure to climate change factors over the 21<sup>st</sup> century. Their model's results suggested that nutrient availability, temperature, and light significantly influence phytoplankton distribution, i.e., nutrient limitation reduced productivity in certain regions, while warmer temperatures favored specific phytoplankton types. Additionally, changes in light availability, influenced by factors like cloud cover, impacted phytoplankton growth especially at high latitudes, with interactions between these factors contributing to spatial and temporal variability in phytoplankton abundance and composition. Together, these studies have shed light on the intricate interplay between environmental forces and phytoplankton responses in some oceanic regions, providing insights into the mechanisms driving phytoplankton blooms and their implications for marine habitats and chemical cycling.

The Argentine Sea is characterized by a dynamic oceanographic regime, influenced by the interaction of multiple water masses



and complex bathymetric features (Piola and Matano, 2001; Piola et al., 2018). Here, the initiation and development of phytoplankton blooms are highly variable, probably influenced by a combination of physical and biological factors, making it an ideal region for studying the effects of light and MLD on phytoplankton bloom development. Observational studies in the region have highlighted the role of ocean dynamics, such as coastal upwelling events and frontal systems, in driving nutrient enrichment and promoting phytoplankton growth (reviewed in Acha et al., 2004; Carreto et al., 2007). Furthermore, satellite remote sensing data, especially chlorophyll-a (Chl-a), have provided important information on the seasonal variability and phenological parameters characterizing phytoplankton biomass in the Argentine Sea, revealing distinct patterns of bloom initiation and propagation (Andreo et al., 2016; Delgado et al., 2023).

In this article, we investigate the effects of the light field (PAR and  $Z_{eu}$ ) and MLD on phytoplankton bloom dynamics in the Southwest Atlantic, focusing on the Argentine Shelf. While the influence of light and mixing on bloom initiation has been widely studied in open-ocean environments, far less is known about how these drivers operate in spatially heterogeneous shelf systems, where local processes such as tidal mixing, frontal activity, and variable bathymetry strongly modulate environmental forcing. To address this gap, we combine reanalysis data (wind, MLD), satellite-derived products (COC2  $PAR$ ), and statistical techniques to evaluate the spatial variability of bloom phenology over two decades (1998–2019) and to assess the predictive capacity of light and mixing variables at seven representative sites across the shelf. This dual-scale approach enables us to test the extent to which classical light-stratification paradigms explain bloom timing in shelf regions and to identify where these paradigms break down. Through this work, we provide new insight into the regional controls and spatial heterogeneity of bloom phenology, which is critical for understanding ecosystem responses to environmental variability and climate change. To do so, we first characterize climatological bloom patterns and phenological metrics across the study area (Section 3.1), then evaluate spatial differences in the timing and structure of seasonal blooms at selected sites (Section 3.2), and finally assess the relationship between bloom variability and light-mixing dynamics using stepwise multiple regression analysis (Section 3.3).

## 2 Data and methods

### 2.1 Study area

The Southwestern Atlantic Ocean (SWAO) exhibits a rich and remarkable diversity of geo-morphological, climatic, and oceanographic features. Part of the continental shelf of this vast region can be further subdivided latitudinally into two distinct subregions (Piola et al., 2018): the Central Shelf (CS), encompassing portions of southern Brazil, Uruguay, and northern Argentina, and the southernmost Patagonian Shelf (PS), located south of  $\sim 38^{\circ}\text{S}$ . In this work, two of the selected sites are considered to be located in the CS because of their characteristics even though they are located  $\sim 39^{\circ}\text{S}$ . The CS is strongly influenced by the continental discharge of the Río de la Plata and limited offshore by the high energy exchange area of Brazil-Malvinas Confluence, an area where the warm, salty waters of the Brazil Current meet the cold, fresh waters of the Malvinas Current. This confluence is also a region with strong currents, upwelling, and eddies (Garzoli and Garraffo, 1989; Matano et al., 2010). The atmospheric variability significantly influences the seasonal circulation patterns in the CS (Ruiz-Estévez et al., 2016; Strub et al., 2015). The semi-permanent South Atlantic anticyclone's southward migration during spring and summer generates southwestward alongshore winds, blocking the passage of cold fronts (Vera et al., 2002). Conversely, its northward displacement in winter increases cold front frequency, leading to northeastward winds. These atmospheric shifts substantially impact ocean circulation in this area (Forbes and Garraffo, 1988; Höflisch, 1984;). The PS, in turn, is constantly affected by westerly winds and a high variability in tidal range (Glorioso and Flather, 1997; Luz Clara et al., 2014; Trenberth, 1991). This



part of the shelf is bounded offshore by cold, low-salinity, nutrient-rich waters of the Antarctic Circumpolar Current, which are advected northward by the Malvinas Current.

To analyze the effects of the light field (PAR and  $Z_{eu}$ ) and MLD on main blooms in the SWAO, we explored the area between  $34^{\circ}$  -  $55^{\circ}$ S and  $50^{\circ}$  -  $70^{\circ}$ W (Figure 1). In particular, seven study sites were selected to further explore the capability of environmental variables related with the water light field and mixing to predict the main bloom peak. The sites were selected given their contrasting oceanographic regimes and their biological relevance (two at the south of CS and the others in the PS region) (Figure 1, Table 1). Moreover, these sites fall within different biogeographical regions described in Delgado et al. (2023), hereafter D2023. The main relevant characteristics of each site are provided below.

- EPEA - Estación Permanente de Estudios Ambientales (EP). This is one of the Marine Ecological Time Series (METS) run by the “Dinámica del Plancton Marino y Cambio Climático (DiPlaMCC)” program from Instituto Nacional de Investigación y Desarrollo Pesquero (INIDEP). It is located in the CS, 13.5 nautical miles offshore near the 50-meter depth isobath ( $38.47^{\circ}$ S/ $57.68^{\circ}$ W). EPEA encounters both near-shore and continental shelf waters, with a persistent Mid-Shelf Front (MSF) often located offshore the 50-meter isobath (Lucas et al., 2005; Martos and Piccolo, 1988). According to in situ sampling (period 2000-2017) the mean surface Chl-a for this site was  $1.08 \text{ mg m}^{-3}$  and the annual climatological maximum was observed in August (Ruiz et al., 2020).

- COSTAL-AR-4 (C4). This site corresponds to the position of station 4 of the COSTAL-AR transect, another METS maintained by DiPlaMCC sited on CS. This transect runs from the coastal sector to the continental slope in a northwest-southeast direction at  $\sim 38^{\circ}$ S. It is predominantly influenced by Subantarctic Shelf Waters, and its mid-shelf location (CS) near the 90 m isobath ( $38.75^{\circ}$ S/ $56.25^{\circ}$ W), between the MSF and the Shelf-Break Front, gives it a typical temperate seasonal stratification cycle. Existing in situ data collected at this site (1987-1989) showed a surface mean Chl-a of  $1.71 \text{ mg m}^{-3}$  and a maximum of  $6.05 \text{ mg m}^{-3}$  in October (Carreto et al., 1995).

- Peninsula Valdés (PV). This site is located on the PS at the PV front ( $42.75^{\circ}$ S/ $63.00^{\circ}$ W), one of the regions where tidal energy dissipation rates are among the highest in the Argentine Shelf (Luz Clara et al., 2015; Moreira et al., 2011; Rivas and Pisoni, 2010). This front plays a crucial role in local hydrographic dynamics, controlled by tidal currents, winds, and enhanced by inshore headlands. It typically develops during spring warming and persists until autumn when stratification weakens. Characterized by a strong horizontal temperature gradient, the PV front separates vertically homogeneous coastal waters from stratified offshore waters (Sabatini and Martos, 2002). This site is located on the seasonally stratified side of the front, where Chl-a concentration is usually high in spring-summer (Carreto et al., 1986). This region is an important fishing ground (e.g., anchovy, hake, shrimps) and a breeding and feeding place for marine mammals and birds (Giaccardi and Caloni, 2022).

- San Jorge Gulf (SJ). This site is located in the southern part of the San Jorge Gulf mouth ( $46.33^{\circ}$ S/ $65.58^{\circ}$ W) on the PS. The vertical structure of the water column and the circulation within the SJ gulf are conditioned by the characteristic westerly winds, and by the effect of tidal mixing (Akselman 1996; Carreto et al. 2007; Glorioso 1987; Guerrero and Piola 1997). At the southern area of the gulf, a complex permanent tidal-thermohaline frontal system (in the north-south direction) is formed, representing the transition between low-salinity, tidally mixed Coastal Waters (Bogazzi et al., 2005) and the more saline, seasonally stratified waters of the continental shelf. Relatively high Chl-a concentrations are generally observed in spring-summer (Segura et al., 2021). The dynamics that characterize the oceanographic fronts favor primary and secondary productivity (Acha et al., 2004, and references therein). The gulf is an area rich in fishery resources, especially the Argentine red shrimp (Bertuche et al., 2000;

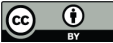

150 Moriondo Danovaro et al., 2016).

151 • Southern Shelf Break (SS). This site is located in the southern part of the shelf break (47.77°S/60.98°W) south of the "Agujero  
152 Azul", a biodiversity rich zone that Argentina intends to declare as a marine protected area. It is part of the productive slope  
153 front, with relatively high Chl-a concentrations all year around, and especially high in spring-summer, where a high primary  
154 production has been estimated (Dogliotti et al., 2014; Segura et al., 2013). Therefore, this region is favorable for the Argentine  
155 squid, and a feeding ground for birds and marine mammals (Acha et al., 2024).

156 • Bahía Grande (BG). This site is located south of 50°S (51.00°S/67.67°W) within the Grande bay, known for its high tidal  
157 energy dissipation. The area experiences a prominent thermal front, particularly during spring and summer (Sabatini et al., 2004).  
158 This front promotes conditions conducive to large phytoplankton blooms, which support abundant zooplankton populations. As a  
159 result, BG is a significant fishing ground for Austral species, such as hoki (Cousseau and Perrota, 2004). According to Luz Clara  
160 (2008), the BG front exhibits the highest chlorophyll-a concentrations towards the end of the year.

161 • Burdwood (BW). It is located in the Burdwood Bank (54.33°S/59.75°W), a submarine plateau where powerful currents  
162 converge, creating unique physical conditions that promote water retention and plankton abundance in the area. This, in turn,  
163 facilitates the operation of the biological carbon pump along its edges. Both the biological and the microbial pumps play a  
164 crucial role in oceanic carbon sequestration, reducing atmospheric carbon dioxide (a greenhouse gas) and mitigating global  
165 warming (Martin et al., 2020). Picophytoplankton, especially *Synechococcus*, dominate the phytoplankton during summer  
166 (Guinder et al., 2020). Because of its high biodiversity, mainly benthic, it was declared a marine protected area called  
167 "Namuncura – Banco Burdwood".

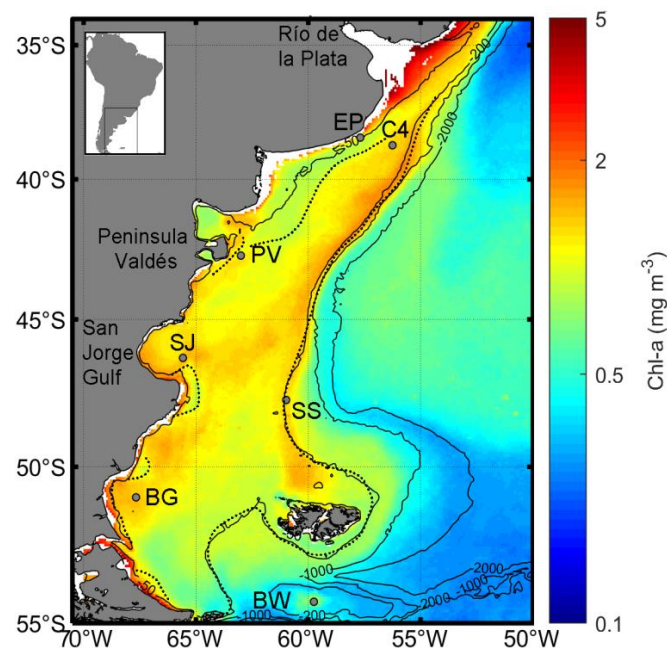

168  
169 **Figure 1** Selected sites overlaid on the mean surface Chl-a concentration distribution from CCI-OC v6.0 (1998–2020). Black  
170 solid lines indicate the 50 m, 200 m, 1,000 m, and 2,000 m isobaths. Schematic frontal zones in the Southwest Atlantic Ocean  
171 (SWAO) are shown as black dotted lines, based on Acha et al. (2018). Site abbreviations correspond to those listed in Table 1.

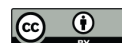

**Table 1** Selected site names, location (latitude, longitude), depth (Z), and biogeographical region (BRG), as defined in D2023, where they are located.

| Site |                                                                | Lat(°) | Lon(°) | Z (m) | BRG |
|------|----------------------------------------------------------------|--------|--------|-------|-----|
| EP   | Estación Permanente de Estudios Ambientales (EPEA) time-series | -38.47 | -57.68 | 52.1  | R2  |
| C4   | COSTAL-AR-4                                                    | -38.75 | -56.25 | 90.8  | R7  |
| PV   | Peninsula Valdes                                               | -42.75 | -63.00 | 75.9  | R9  |
| SJ   | San Jorge Gulf                                                 | -46.33 | -65.58 | 78.8  | R9  |
| SS   | Southern Shelf break                                           | -47.77 | -60.98 | 276.8 | R8  |
| BG   | Bahia Grande                                                   | -51.00 | -67.67 | 95.6  | R9  |
| BW   | Burdwood Bank                                                  | -54.33 | -59.75 | 89.3  | R1  |

## 2.2 Chlorophyll-a data

Satellite-derived surface Chl-a ( $\text{mg l}^{-3}$ ) obtained from the European Space Agency's Ocean Colour Climate Change Initiative (OC-CCI) was used as a proxy of phytoplankton biomass. Level 3 Chl-a product at 4 km and 8-day resolution for the period 1998-2020 was downloaded (<http://www.esa-oceancolour-cci.org/>) and extracted over the study area ( $34^{\circ}$ - $55^{\circ}$ S;  $55^{\circ}$ - $70^{\circ}$ W). The OC-CCI Chl-a version 6 product uses remote sensing reflectance ( $R_{rs}$ ) from multiple sensors (Sea-viewing Wide Field of View Sensor (SeaWiFS), MODerate resolution Imaging Spectroradiometer (MODIS-Aqua), Medium Resolution Imaging Spectrometer (MERIS), Visible Infrared Imaging Radiometer Suite (VIIRS) and Ocean and Land Colour Instrument (OLCI)) that were band-shifted and bias-corrected to match MERIS bands. Chl-a is calculated using the merged  $R_{rs}$  by blending multiple algorithms (OCI, OCI2, OC2 and OCx) with the weighting determined by water class memberships (14 optical classes). Although OC-CCI was originally focused on Case-1 waters, i.e., water where phytoplankton chlorophyll-a primarily determines the optical properties of the water, part of the in situ data used for selecting the in-water algorithms included Case-2 waters (where the optical properties vary independently of the Chl-a) and together with some flagging and the algorithm choice based on optical water classification, Chl-a retrieval in Case-2 waters are also accounted for (D4.2 - Product User Guide for v6.0 Dataset: <https://climate.esa.int/en/projects/ocean-colour/key-documents/>; Sathyendranath et al., 2019). Even though CCI-OC merged Chl-a product has not been validated specifically for the whole area of the present study, in general it showed good accuracy when compared to globally distributed in situ Chl-a data ( $R^2=0.78$ ,  $\text{RMSE}=0.15$ ; Yu et al., 2023). The 8-day, instead of daily, temporal resolution product was selected in order to avoid large gaps in the data and at the same time to allow detecting the main phytoplankton bloom with accuracy and precision (Ferreira et al., 2014; Racault et al., 2014). In order to further reduce the remaining gaps, which are prominent in winter at higher latitudes, a three-step gap filling was applied (Racault et al., 2014). This method fills gaps using a 3x3 pixel window to interpolate spatially neighboring pixels in latitude and longitude and then temporally using the previous and following week-image when available. In order to match the spatial resolution of the environmental information used in this study, data was resampled to 9 km and coastal waters, where the standard Chl-a algorithm is known to fail, were masked (pixels at depths < 20m).

## 2.3 Environmental variables

The following environmental variables related to the light and the stability of the water column were used to evaluate the major mechanisms driving phytoplankton dynamics. The Photosynthetically Available Radiation (PAR) incident at the surface is the





mean daily irradiance, i.e., photon flux density, in the visible range (400 to 700 nm) that can be used for photosynthesis. The 8-day and 4 km spatial resolution merged PAR product provided by GlobColour project and distributed by ACRI-ST (<https://hermes.acri.fr/>) was downloaded. This PAR product ( $\text{mol quanta m}^{-2} \text{ day}^{-1}$ ) results from merging the original Level 2 products from MODIS, SeaWiFS, and VIIRS (NPP and JPSS-1) sensors (Frouin et al. 2003). The euphotic depth ( $Z_{\text{eu}}$ ), here defined as the depth at which the irradiance is 1% of its PAR value at surface assuming a constant attenuation coefficient and optically homogeneous waters, was calculated using satellite data. Two parameterizations (Morel et al. 2007), using either satellite-derived Chl-a or the attenuation coefficient at 490 nm ( $K_d(490)$ ) were first evaluated using  $Z_{\text{eu}}$  calculated from in situ PAR profiles (Biospherical PUV-500/510B) collected at EPEA time series in the period 2000-2016 ( $n=41$ ). The merged Level 3  $K_d(490)$  product at 4 km and 8-day resolution for the period 1998-2020 was obtained from the European Space Agency's OC-CCI. The parameterization using  $K_d(490)$  as input, with the layer thickness set to  $1/K_d(490)$ , yielded better results. Although both models had a slope close to 1 (type-2 linear regression), the Chl-a-based model showed a lower coefficient of determination, larger positive bias (overestimation), and higher scatter ( $R^2=0.71$ , bias=23.6%, APD=25%) compared to the  $K_d(490)$ -based model ( $R^2=0.79$ , bias=-1.1%, APD=10.7%). Consequently,  $Z_{\text{eu}}$  modeled using the OC-CCI  $K_d(490)$  product was adopted for the present study. Mixed layer depth (MLD) data were obtained from the Copernicus Marine Environment Monitoring Service (CMEMS) GLORYS12V1 reanalysis product (Lellouche et al., 2021). GLORYS12V1 is a global ocean eddy-resolving model with a uniform horizontal grid spacing of  $1/12$  degrees and 50 vertical levels. The MLD within this dataset is determined by identifying the depth at which the temperature gradient exceeds a threshold of  $0.1^\circ\text{C m}^{-1}$ . The 10-meter zonal (U) and meridional (V) wind component gridded fields were obtained from the Copernicus Climate Data Store (<https://marine.copernicus.eu/>) for the ERA5 reanalysis product. The wind-curl and wind intensity fields were computed from U and V. The wind data is provided at hourly temporal resolution and a 0.25-degree spatial resolution. ERA5 is the fifth-generation atmospheric reanalysis produced by the European Centre for Medium-Range Weather Forecasts (ECMWF). It integrates atmospheric observations from various sources with a global circulation model to create a temporally consistent and spatially complete dataset. To ensure consistency and comparability, all environmental variables were re-gridded to match the spatiotemporal resolution of Chl-a data (9-km, 8-day).

## 2.4 Ecological and physical indices

To study the phytoplankton dynamics and the major environmental drivers affecting them, different ecological and physical metrics were estimated (Table 2) based on the phenological parameters defined by Platt and Sathyendranath (2008). In the present study we focus on the main bloom event of the year, defined as the Chl-a maximum within a 12-month period (year). Bloom initiation was identified when Chl-a exceeded 5% of the annual median value. This bio-based threshold approach has been extensively and successfully used in previous phytoplankton phenology studies (e.g., Bricaud et al., 2023; Ferreira et al., 2021; Krug et al., 2018; Recault et al. 2012; Siegel et al. 2002). The other metrics estimated were the time of the bloom initiation ( $TB_{\text{init}}$ ) and termination ( $TB_{\text{end}}$ ) defined as the first time step (8-day) when the Chl-a value raised and the previous time step when it fell below 5% of the annual median, respectively, and the time and value of the main bloom or Chl-a peak ( $TB_{\text{peak}}$  and  $B_{\text{peak}}$ ).

Mean phenological metrics between 1998 and 2019 were first calculated for the whole region by calculating for each pixel the average of the Chl-a concentration for each 8-day image during the 1998-2019 period thus obtaining a mean annual cycle ( $n=46$ ) for each pixel. In turn, the same metrics were calculated using the full Chl-a time series ( $n=46 \times 22 = 1012$ ) at the 7 selected sites thus a time series of the estimated metrics for each year ( $n=22$ ). Using the same fixed 12-month period (year) to examine the phytoplankton growth cycle for all the areas can be unsuitable (Recault et al. 2012). In the southern regions ( $>39^\circ\text{S}$ ) blooms



usually occur late (December) or early (January-February) in the year, therefore using the fixed conventional calendar year can lead to inconsistent estimation of the main bloom. Consequently, for the sites located north of 39°S (EP and C4), the conventional calendar year (January-December) was used, while a 1-year temporal window from June to May was applied for sites south of 39°S, i.e., PV, SJ, SS, BG and BW.

Physical indices were derived from PAR, MLD and  $Z_{eu}$  datasets. The ratio between  $Z_{eu}$  and MLD ( $Z_{eu}:MLD$ ) was estimated. This ratio is an index that helps quantifying the concept that phytoplankton growth would be favored when light penetrates deeper than the mixed layer, i.e.,  $Z_{eu}:MLD > 1$  (Sverdrup, 1953). Cushing (1989) referred to it as the ‘production ratio’ and link it to the ability of different phytoplankton groups to dominate under varying ratio values.

**Table 2** Ecological and Physical metrics.

| Metric             | Description                               | Unit                                       |
|--------------------|-------------------------------------------|--------------------------------------------|
| TB <sub>init</sub> | Time (8-day) of the main bloom initiation | week                                       |
| TB <sub>peak</sub> | Time (8-day) of the main bloom peak       | week                                       |
| TB <sub>end</sub>  | Time (8-day) of the main bloom end        | week                                       |
| B <sub>peak</sub>  | Maximum Chl-a (main bloom peak)           | mg m <sup>-3</sup>                         |
| PAR                | Photosynthetically Available Radiation    | Mol quanta m <sup>-2</sup> d <sup>-1</sup> |
| MLD                | Mixed Layer Depth                         | m                                          |
| $Z_{eu}$           | Depth of the euphotic zone                | m                                          |
| $Z_{eu}:MLD$       | $Z_{eu}$ to MLD ratio                     | -                                          |
| U-wind             | Zonal wind speed                          | m s <sup>-1</sup>                          |
| V-wind             | Meridional wind speed                     | m s <sup>-1</sup>                          |
| Wind-curl          | Wind curl                                 | s <sup>-1</sup>                            |

## 2.5 Statistical analysis

Stepwise linear regression (SWLR) analysis was used to explore the capability of different variables to predict the main bloom peak at seven selected sites in the Argentine continental shelf. SWLR is a predictor selection method that iteratively applies forward and backward linear regression to determine a final linear model. At each step, a predictor is either included or removed based on statistical significance, so that only meaningful predictors are retained in the final model. The selection process is guided by partial F tests, which evaluate whether the inclusion of a predictor significantly improves the model fit (Yang et al., 2017). Specifically, the F-statistics compares the variance explained by the model with and without the predictor, using thresholds for F-to-enter and F-to-remove of 0.05 and 0.10, respectively. If the computed F-value exceeds the critical threshold, the predictor is included in the model. SWLR is considered a useful analytic tool when predictors may not be statistically independent since it avoids collinearity among the predictors and develops a reliable regression model (González-Reyes et al., 2024). Machine learning methods were not considered for this analysis because they require large datasets for training and testing the models while the available data used in this study was scarce at the interannual scale. A brief description of the SWLR steps is provided in Torres et al. (2024). The SWLR analysis has been used in quantification of linear linkages between factors and response (Li et al., 2021), and forecasting science (Ribeiro Torres et al., 2024; and references therein).



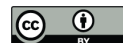

To avoid spurious results caused by the seasonal variability observed in the time series of physical variables and Chl-a parameters, we subtracted the seasonal cycle from the data. In addition, due to the large dissimilarities in the variability range, we standardized the time series previous to the SWLR analysis. Hence, all the predictors and  $B_{peak}$  time series have zero mean and unit variance. Moreover, the normalization of time series allows for the qualitative identification of the explained variance importance of each predictor (Aiken 1991) through the analysis of the model's coefficients (a larger coefficient indicates a higher explained variance).

The predictors (inputs) considered in the analysis included 8-day mean U-wind, V-wind, wind speed, and wind-curl; 8-day mean MLD, PAR,  $Z_{eu}$ , and  $Z_{eu}$ :MLD ratio, all measured at the time of the main bloom peak ( $TB_{peak}$ ). To capture pre-bloom conditions, we also included the mean values of these predictors over the two and four weeks leading to  $TB_{peak}$ , denoted by subscripts 2 and 4, respectively. For example  $MLD_2$  represents the average MLD over the two weeks prior to the bloom peak. The response variable is the standardized non-seasonal Chl-a anomaly at the peak, denoted  $B'_{peak}$  in the following. This response variable accounts for different seasonal regimes of Chl-a concentration between northern and southern sites.

The SWLR model was expressed as follows:

$$\tilde{B}'_{peak} = \sum_{i=1}^m \beta_i X_i + \epsilon, \quad (1)$$

where  $\beta_i$  are the regression coefficients,  $X_i$  are the selected predictors,  $\epsilon$  is the residual error, and  $m$  is the number of selected predictors. Note that the statistical model has no intercept because all the variables, including, the response variable, are standardized. The model's performance in predicting  $B_{peak}$  anomalies was evaluated using two metrics: the explained variance ( $R^2$ ) and the root mean square error (RMSE). The  $R^2$  statistic quantifies the proportion of variance in  $B'_{peak}$  explained by the model, while RMSE measures the average prediction error.

### 3 Results and discussion

#### 3.1 Bloom climatology

Figure 2 illustrates the mean timing and intensity of key phenological phases of the phytoplankton bloom cycle across the study area: time of the bloom initiation ( $TB_{init}$ ) and bloom peak ( $TB_{peak}$ ), and mean maximum chlorophyll-a concentration ( $B_{peak}$ ). The spatial distribution of these phases provides insights into the variations in bloom dynamics across the region, highlighting the influence of oceanographic and climatological conditions.

$TB_{init}$  varies significantly across the study area, with earlier initiation in the Central Shelf (CS) and later initiation in the Patagonia Shelf (PS). In the CS region,  $TB_{init}$  typically occurs in May north of  $35^\circ S$ , and between July and September between  $35^\circ$  and  $39^\circ S$ , likely due to higher light levels and shallow mixed layers that enable sufficient light penetration for early phytoplankton growth. As winter transitions to spring, increased solar radiation and reduced turbulence create favorable conditions for bloom onset. A slightly different situation occurs near the coast (depth  $< 50m$ ), where bloom initiates even earlier in autumn (around April).

On the other hand, the PS region, influenced by colder, nutrient-rich waters mostly of Subantarctic origin, experiences a delayed  $TB_{init}$ , generally from September to November. Here, deeper mixed layers require more time for warming and stratification, which postpones bloom initiation. In areas near frontal zones and upwelling regions,  $TB_{init}$  also shows variability, with nutrient



298 influx through localized mixing events supporting bloom onset as soon as light conditions become adequate.

299 The timing of the bloom peak ( $TB_{peak}$ ) follows the pattern of  $TB_{init}$ , with peak timing occurring earlier in the CS than in the PS.

300 In the CS region,  $TB_{peak}$  is typically reached by September to November, reflecting the rapid response of phytoplankton to

301 favorable light and nutrient conditions following  $TB_{init}$ . Shallow mixed layers in this area further enhance light penetration,

302 promoting an early peak. Near the coast, the peak occurs in autumn and winter months, probably related to phytoplankton

303 communities adapted to low light and turbulence, as will be explained later (section 3.2).

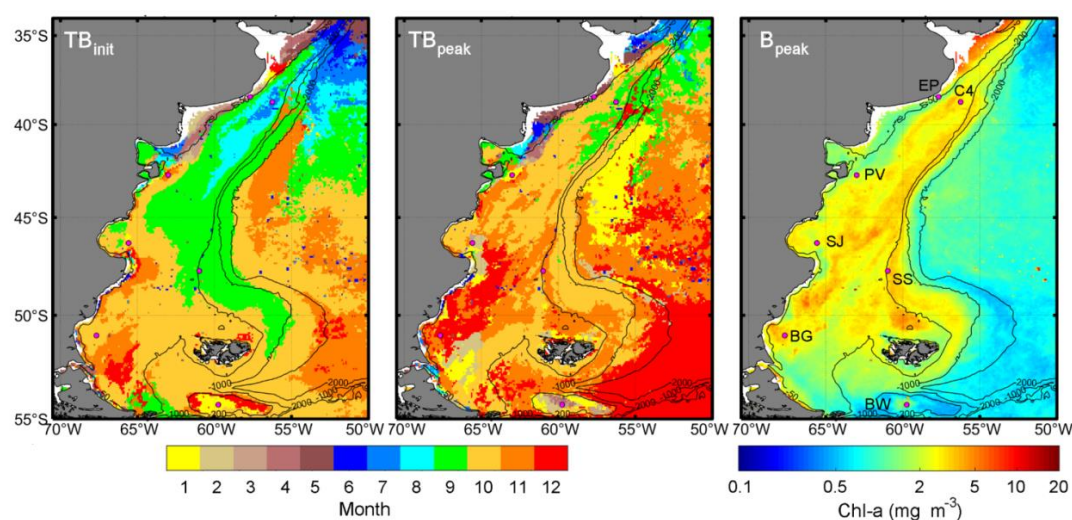

304 **Figure 2** Mean time of the year (month) of the main bloom initiation ( $TB_{init}$ ), peak ( $TB_{peak}$ ) and mean maximum Chl-a ( $B_{peak}$ ).

305 Black lines indicate 50 m, 200 m, and 2,000 m isobath contours.

307 In the PS region, however,  $TB_{peak}$  is mostly delayed to December or January, in line with the latter  $TB_{init}$ . The dependency on

308 seasonal warming and stratification, as well as the influence of Subantarctic waters and the Malvinas Current, prolongs the

309 conditions needed for peak phytoplankton growth in this colder region. This later peak timing is consistent with the PS's need for

310 extended periods of sunlight to support high phytoplankton productivity.

311 The bloom intensity ( $B_{peak}$ ) also varies greatly across the study area (Figure 2). The highest  $B_{peak}$  values are observed along the

312 southern PS and near frontal systems, where nutrient-rich upwelling and favorable light conditions sustain high chlorophyll-a

313 concentrations. Frequent upwelling events bring nutrients to the surface, while frontal systems promote vertical mixing,

314 supporting intense phytoplankton blooms in these areas and underscoring the high productivity of the PS as a biological hotspot.

315 In contrast, offshore regions away from nutrient sources exhibit lower  $B_{peak}$  values. Nutrient limitations and deeper mixed layers

316 in these areas move phytoplankton below the euphotic zone constraining phytoplankton growth. This variation in  $B_{peak}$  across the

317 study area highlights the critical role of water column structure, influencing nutrient dynamics and the light regime to which the

318 cells are exposed, in determining bloom intensity.

319 Bloom phenology in the Southwest Atlantic shows a complex spatial gradient modified by currents and fronts. The spatial

320 distribution of the bloom timing phases found agree with a previous study which focused only on the PS region of the SWAO

321 (Andreo et al. 2016). The described patterns in this study emphasize the influence of regional oceanographic conditions on



322 bloom dynamics across the Southwest Atlantic.

### 323 3.2 Bloom phenology at selected sites

324 The timing of the main phytoplankton bloom peak ( $TB_{peak}$ ) differed between northern and southern sites, as mentioned in the  
325 previous climatological section. At the two sites located in the north of the study region, EP and C4, the maximum frequency of  
326  $TB_{peak}$  occurrence was primarily in autumn and winter (Figure 3). On the other hand, at southern sites the main bloom  
327 predominantly occurred in spring and summer.

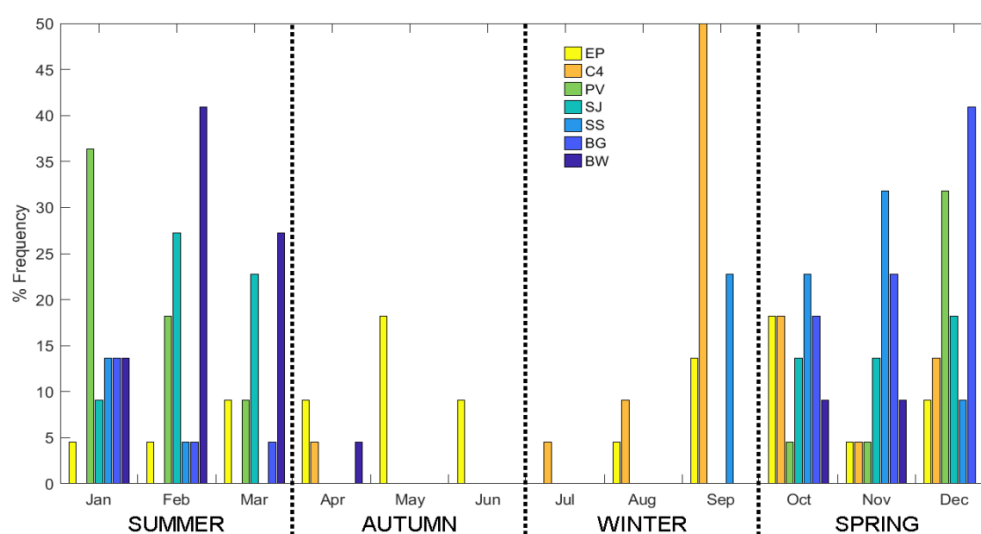

328

329 **Figure 3** Frequency of occurrence, for the studied period (1998-2019), of the main bloom peak at each site per month.

330 At EP, a coastal site, the climatological Chl-a phenology showed a distinct pattern, with the main bloom extending from end of  
331 March to end of June and peaking by the end of May (Figure 4), being on average the lowest  $B_{peak}$  ( $1.36 \text{ mg m}^{-3}$ ) compared to  
332 the other sites analyzed. It is worth noting that the timing of the main bloom showed high variability, being the highest and  
333 equally frequent in both May and October while also occurring in other months, except in July (Figure 3). The mean main bloom  
334 at this site occurred in autumn and Chl-a values stayed relatively stable around  $\sim 1 \text{ mg m}^{-3}$  in winter (Jul-Sep) coinciding with a  
335 deeper MLD (i.e., the water column was practically mixed up to the bottom) and the lowest incident PAR and  $Z_{eu}$ , being thus the  
336  $Z_{eu}$ :MLD ratio also low ( $<1$ ). At the beginning of spring (end of Sep), a secondary peak can be observed as the PAR increases  
337 and the MLD shallows. Then the phytoplankton biomass (parameterized by Chl-a) starts decreasing in spring and reaching the  
338 lowest values in summer ( $<1 \text{ mg m}^{-3}$ ) when the MLD is shallow, PAR and  $Z_{eu}$  are high and the  $Z_{eu}$ :MLD is  $>>1$ . Field studies at  
339 this site have reported that during the cold period there is a dominance of micro-phytoplankton, especially large diatoms that are  
340 able to grow in low light turbulent environments; while during summer the community is dominated by ultra-phytoplankton,  
341 especially cyanobacteria that are adapted to take advantage of the low nutrient regime imposed by a stratified water column  
342 (Ruiz et al., 2020; Silva et al., 2009). Compared to the other sites, EP showed the highest inter-annual variability in the time of  
343 initiation, peak and end of the main bloom (Figure 5). From the 22 years considered, only in 7 cases the  $TB_{peak}$  occurred within  
344 the climatological timeframe. In 14 cases the duration was shorter than, or hardly reached, 2 months. Regarding  $B_{peak}$ , it ranged  
345 between  $1.2$  and  $3.3 \text{ mg m}^{-3}$ , and in 9 years  $B_{peak}$  was higher than  $2 \text{ mg m}^{-3}$ .

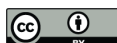

At C4, the main bloom occurred most frequently in September (50%), but it also occurred in other months, with October and December being the second and third most frequent months (Figure 3). The C4 site, located on the shelf, showed characteristics of a temperate regime. Climatologically, the bloom extends from mid-July to the beginning of December, peaking in September and remaining with high Chl-a until November (Figure 4). At the mean  $TB_{peak}$  (end of winter - beginning of spring), the MLD was slowly becoming shallower (stratification was beginning to develop) and PAR and  $Z_{eu}$  were slowly increasing; as a consequence, the  $Z_{eu}$ :MLD ratio also slowly increased (climatologically getting closer to  $\sim 1$ ); all of which provided good conditions for the growth of phytoplankton, consistent with Sverdrup's theory (Sverdrup, 1953). In turn, during summer (January-March), phytoplankton biomass was limited presumably due to the low nutrient availability and grazing pressure. At this site the inter-annual variability was not too high, showing high consistency in the timing at different years compared to the climatological period, i.e., the  $TB_{peak}$  occurred within the climatological period in 19 of the 22 years. In 2012 two Chl-a peaks occurred with very similar intensity, one in May ( $3.38 \text{ mg m}^{-3}$ ) and one in mid-September ( $3.36 \text{ mg m}^{-3}$ ), the latter occurring within the climatological period (Figure 5). In turn, the  $B_{peak}$  range was wide, varying between  $1.6$  and  $10.1 \text{ mg m}^{-3}$ , and higher than  $4 \text{ mg m}^{-3}$  in 13 out of the 22 years.

At PV, the main bloom occurred in spring and summer (Figure 3), most frequently in January (37%) and closely followed by December (32%). The mean climatological bloom extended from November to the end of April (Figure 4) and peaked in January, when the water column was strongly stratified (shallow MLD). This stratification keeps phytoplankton on the illuminated upper layer (high PAR, deep  $Z_{eu}$ , and high  $Z_{eu}$ :MLD ratio), and it is probably maintained by the input of nutrients across the oceanographic front (Carreto et al., 1986; Lutz and Carreto, 1991). There is a high consistency in the timing of  $TB_{peak}$  in all the years (Figure 5) compared to the range of climatological duration (beginning of November – end of April). The duration of the bloom was at least 4 months in 8 of the 22 years, with only 3 years in which it lasted slightly more than 1 month. The  $B_{peak}$  range was wide, varying between  $1.6$  and  $9 \text{ mg m}^{-3}$ , but  $B_{peak}$  was lower than  $3.8 \text{ mg m}^{-3}$  in 14 years.

At SJ,  $B_{peak}$  occurred most frequently in February (42%), followed by March (27%) (Figure 3). At this site, located on a front at the south bank of the San Jorge Gulf (Figure 1), the bloom extended from October to April (Figure 4), peaked in February, and high concentrations of Chl-a are maintained approximately from end-November until end-March, probably due to the favorable conditions provided by the front, i.e., vertical stability, allowing the cells to stay in the euphotic zone (shallow MLD, high PAR, high ratio  $Z_{eu}$ :MLD), and horizontal input of nutrients (Akselman, 1996; Segura et al., 2021). At SJ there was also a high consistency in the timing of the main bloom in all the years and the mean climatology, i.e., the  $B_{peak}$  occurred within the climatological duration of the bloom (late October – early April). The range of  $B_{peak}$  values was between  $2.2$  and  $7 \text{ mg m}^{-3}$ , and  $B_{peak}$  was below  $4 \text{ mg m}^{-3}$  in half of the years.

At SS,  $B_{peak}$  occurred most frequently in November (32%), followed by September and October (24%) (Figure 3). At this site, located at a southern zone of the shelf-break front, the climatological bloom extended from September to March and peaked at the beginning of November (Figure 4). At the time of the peak, the incident PAR was high, MLD was shallow, and the  $Z_{eu}$ :MLD ratio was around 1. Again, at this site phytoplankton biomass was relatively high in spring and summer (until the end of February), probably given the input of nutrients from the Malvinas Current across the front (Carreto et al., 2007). Also, at this site there was a high consistency and in all of the years  $TB_{peak}$  occurred within the climatological duration of the bloom (September – March). The  $B_{peak}$  range was between  $2.7$  and  $9.8 \text{ mg m}^{-3}$ , and  $B_{peak}$  was higher than  $5.2 \text{ mg m}^{-3}$  in approximately half of the years.

At BG,  $B_{\text{peak}}$  occurred more frequently in December (41%), followed by lower frequencies in November (23%) and October (19%) (Figure 3). At this site, the bloom had a relatively short temporal duration, initiating in mid-October and ending by the end of January with a constrained, but high ( $\sim 3.8 \text{ mg m}^{-3}$ ) climatological Chl-a peak around the beginning of December (Figure 4). Here, the effect of a circulation front, providing a source of nutrients (Carreto et al., 2018; Sabatini et al., 2004; Segura et al., 2013) was also clear. At the time of the bloom peak, PAR was the highest, MLD the lowest, and the  $Z_{\text{eu}}:\text{MLD}$  ratio was slightly  $> 1$ . The  $B_{\text{peak}}$  occurred most of the years within the climatological duration, except in 2016 and 2019 when  $B_{\text{peak}}$  occurred later, i.e., in February and March, respectively. The range of  $B_{\text{peak}}$  varied between 2.1 and  $20.4 \text{ mg m}^{-3}$ , and  $B_{\text{peak}}$  was higher than  $6.5 \text{ mg m}^{-3}$  in 8 out of the 22 years.

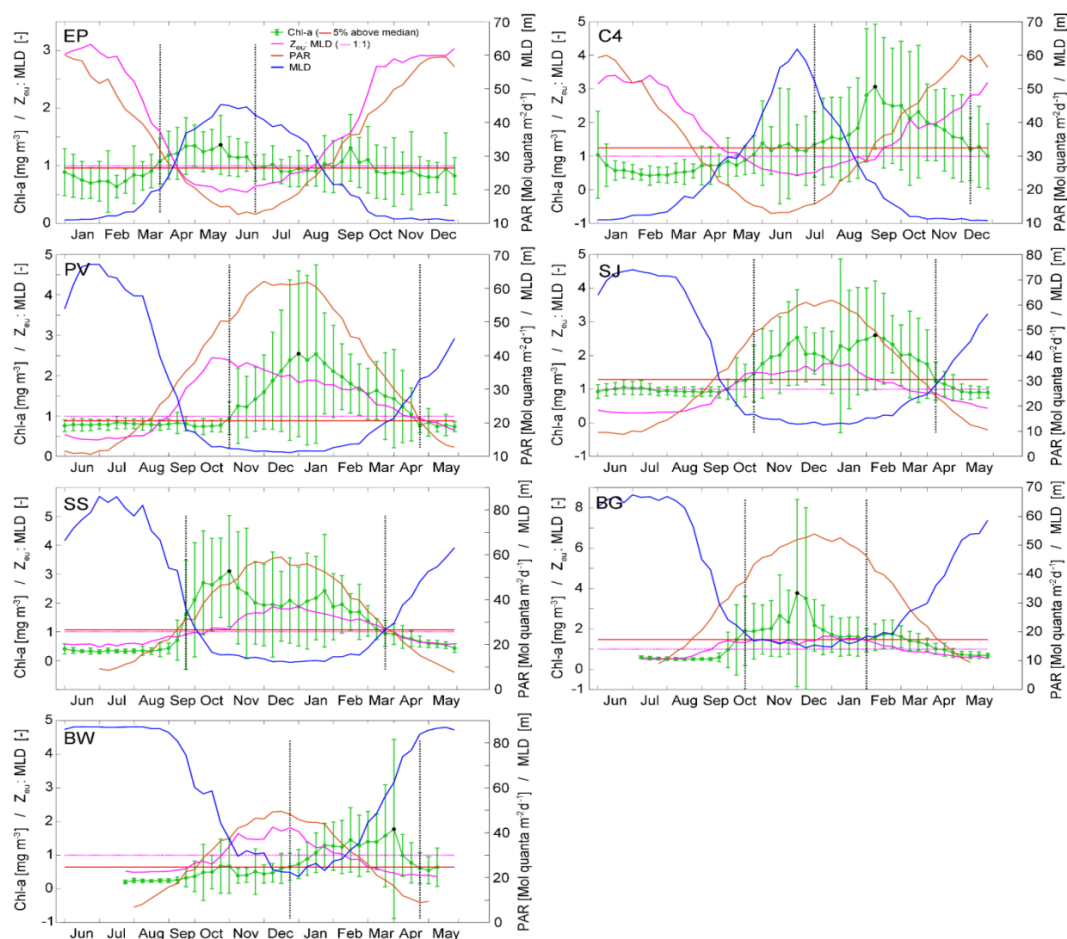

**Figure 4** Annual climatology of Chl-a (bars show standard deviation),  $Z_{\text{eu}}:\text{MLD}$ , PAR, and MLD at each site. Average maximum Chl-a, start and end of main bloom are indicated with a black dot and vertical dashed lines, respectively. Notice that the cycle at EP and C4 are plotted from January to December while for the other sites it is from June to May.

At BW, the maximum Chl-a concentration occurred more frequently in February (41%) and March (26%) (Figure 3). At this site, the bloom extended from the end of December until the end of April, reaching a climatological peak at the beginning of April, but with a plateau of relatively high Chl-a values from the end of January until beginning of April (Figure 4). Consequently, the phytoplankton biomass increased in autumn, when PAR was decreasing, mixing was increasing (MLD was getting deeper), and



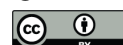

399 the  $Z_{eu}$ :MLD ratio was  $<1$ . There was also a good consistency between the bloom timing in the different years and the  
400 climatological cycle.  $B_{peak}$  ranged between 1.1 and 3.9  $\text{mg m}^{-3}$  and Chl-a was higher than 2.1  $\text{mg m}^{-3}$  in 15 out of the 22 years. It  
401 is worth mentioning that in winter (between May and end of July) there is no satellite-derived Chl-a data at this latitude (grey  
402 area in Figure 5) given that regions with high sun zenith angles ( $>70^\circ$ ) are masked in the standard processing.  
403

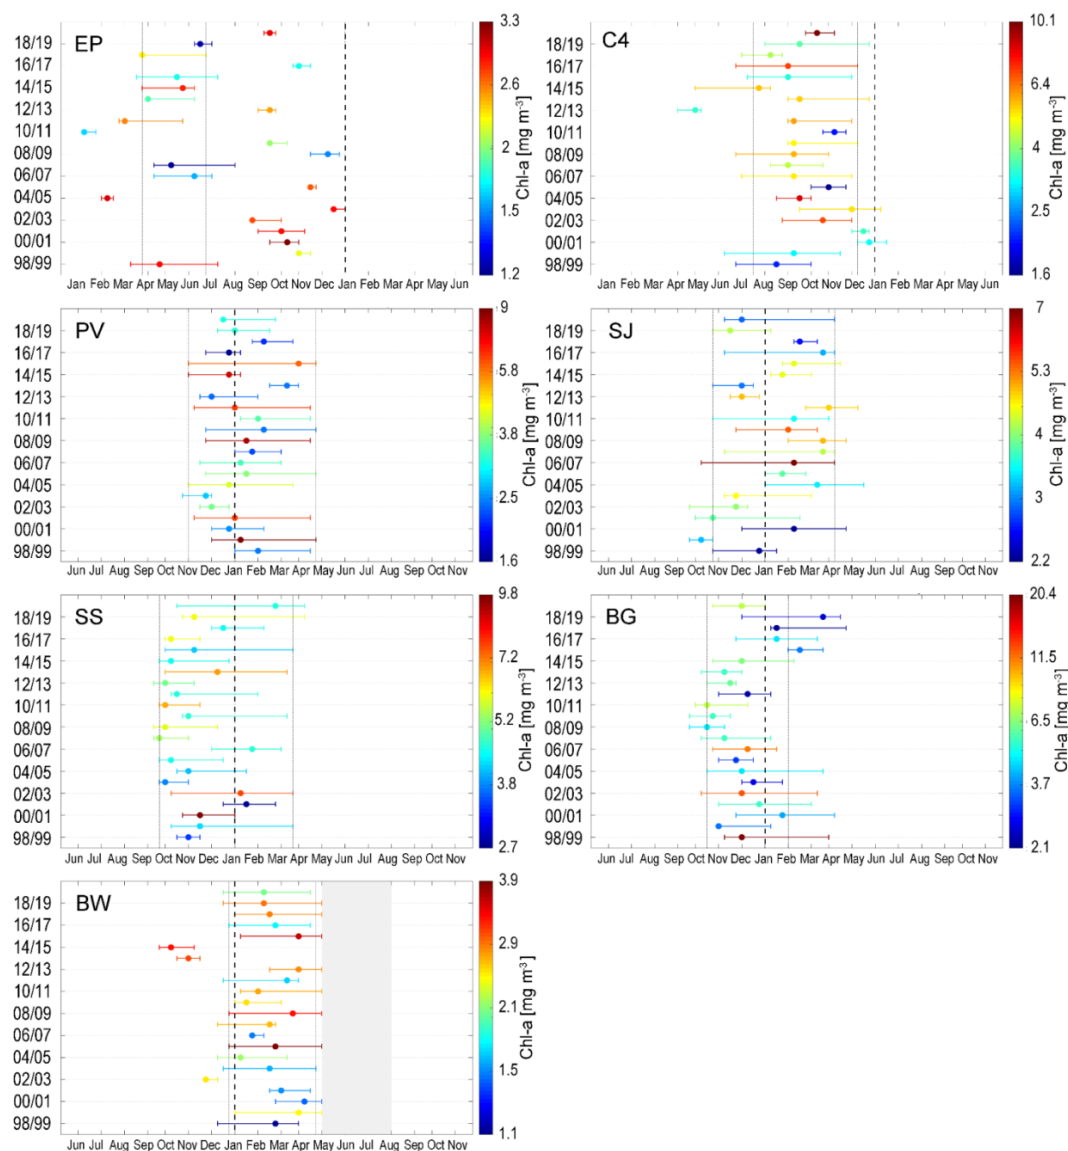

404

405 **Figure 5** Interannual variability of timing (initiation, peak and ending) of the main bloom at each site. The average time of start  
406 and end of the main bloom are indicated with vertical dotted lines and the beginning of the year with a vertical dashed line.  
407 Notice that the cycle at EP and C4 are plotted from January to December while for the other sites it is from June to May.

408 In a recent work, D2023 proposed the partition of the SWAO into nine biogeographical regions based on the temporal variability  
409 of Chl-a concentration and Self-Organizing Maps (SOM) analysis using a similar satellite-derived Chl-a data set (GlobColour  
410 Project). The timing, values and ranges found in this work for the selected sites are similar to the mean values for the





corresponding regions reported in D2023, while some discrepancies were found at EP. It is worth noting that this site showed a high interannual variability in timing and  $B_{\text{peak}}$  values and that the region in D2023 where EP is located ( $R^2$ ) includes different and disconnected areas, i.e., the northern inner shelf waters and the oceanic waters outside the shelf-break (north of  $44^\circ\text{S}$ ), which can explain the differences found.

### 3.3 Modeling the main bloom

The explained variance ( $R^2$ ) of the SWLR models for the standardized non-seasonal Chl-a anomaly at the peak,  $B'_{\text{peak}}$ , differed at the different sites. In almost all of the sites the SWLR model explained more than 70% (reaching 92% in SJ) of the variance in  $B'_{\text{peak}}$ , except in the BG site ( $R^2 \sim 0.46$ ). Different variables resulted in good predictors of  $B'_{\text{peak}}$  depending on the site (Table 2). The main predictors are analyzed and discussed separately for each site.

At EP, the SWLR model explained  $\sim 72\%$  of the variance of  $B'_{\text{peak}}$  (Figure 6),  $Z_{\text{eu}}$  is the best predictor, followed by U-wind, both showing an inverse relationship (negative coefficients) with  $B_{\text{peak}}$  anomaly (Table 2). The  $Z_{\text{eu}}$  contribution at the time of the peak can be related to the fact that the highest Chl-a levels are typically reached in late winter or early spring when the water column is mixed (deep MLD). This intense mixing suspends more material (Lutz et al., 2006; Ruiz et al., 2020), reducing light penetration (lower incident PAR) and, consequently, shallowing the  $Z_{\text{eu}}$ . On the other hand, the inverse relation with U-wind indicates that weaker westerly winds are associated with favorable conditions for phytoplankton growth. The RMSE ( $\sim 0.55$ ) highlights the relative deficiency of the linear model in representing the peak intensity in some cases (Figure 6).

At C4, the SWLR showed an  $R^2$  value close to 0.75, suggesting a good skill of the linear model in representing the interannual variability of the  $B'_{\text{peak}}$ . However, the RMSE value ( $\sim 0.52$ ) evidenced that the linear model was not able to efficiently capture the peak intensity in several cases. The main predictors that modulate  $B'_{\text{peak}}$  variability are the  $Z_{\text{eu}}$ :MLD ratio, followed by its mean value in the preceding 4 weeks ( $Z_{\text{eu}}$ :MLD<sub>4</sub>), both of which denote an inverse relationship with the response variable. This is consistent with the climatological analysis according to Sverdrup's theory (i.e., phytoplankton growth depends on the balance between  $Z_{\text{eu}}$  and MLD).

At PV, the SWLR model explained  $\sim 73\%$  of the variance in  $B'_{\text{peak}}$  (Figure 6),  $Z_{\text{eu}}$  (negative) being the only relevant predictor able to explain the anomalies. At this site, located on the stratified side of a tidal front, environmental characteristics were probably quite similar throughout the years, and the inverse relationship between the depth of the euphotic layer and the intensity of the bloom peak may be due to the attenuation of light by the phytoplankton itself producing the shallowing of  $Z_{\text{eu}}$ . The RMSE  $\sim 0.53$  reflects the mismatch in some cases.

At SJ, the SWLR had the highest  $R^2$  compared to the other sites ( $\sim 0.92$ ) in the prediction of  $B'_{\text{peak}}$  (Figure 6). Here several predictors were relevant to explain the  $B_{\text{peak}}$  anomalies. The largest contribution to  $B'_{\text{peak}}$  was given by  $Z_{\text{eu}}$ , followed by  $Z_{\text{eu}}$ :MLD<sub>4</sub>, PAR and U-wind<sub>2</sub>; three of them were related to light (negative  $Z_{\text{eu}}$  and  $Z_{\text{eu}}$ :MLD<sub>4</sub> and positive PAR), and one to wind (negative U-wind<sub>2</sub>). This would indicate that when the intensity of the bloom is higher,  $Z_{\text{eu}}$  is shallower due to self-shading by phytoplankton; in the same sense in the month previous to the bloom peak the ratio  $Z_{\text{eu}}$ :MLD<sub>4</sub> was low, i.e., as MLD becomes shallower (favoring stratification) the growth of phytoplankton would shallow the  $Z_{\text{eu}}$ . The positive relationship with PAR, which would be expected always, becomes significant at this site. The negative relationship with U-wind<sub>2</sub> suggests weakened westerly winds within the two weeks preceding the bloom peak, would favor stratification. Here the match between observed and modeled  $B'_{\text{peak}}$  was good in most of the cases (RMSE=0.31).

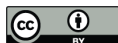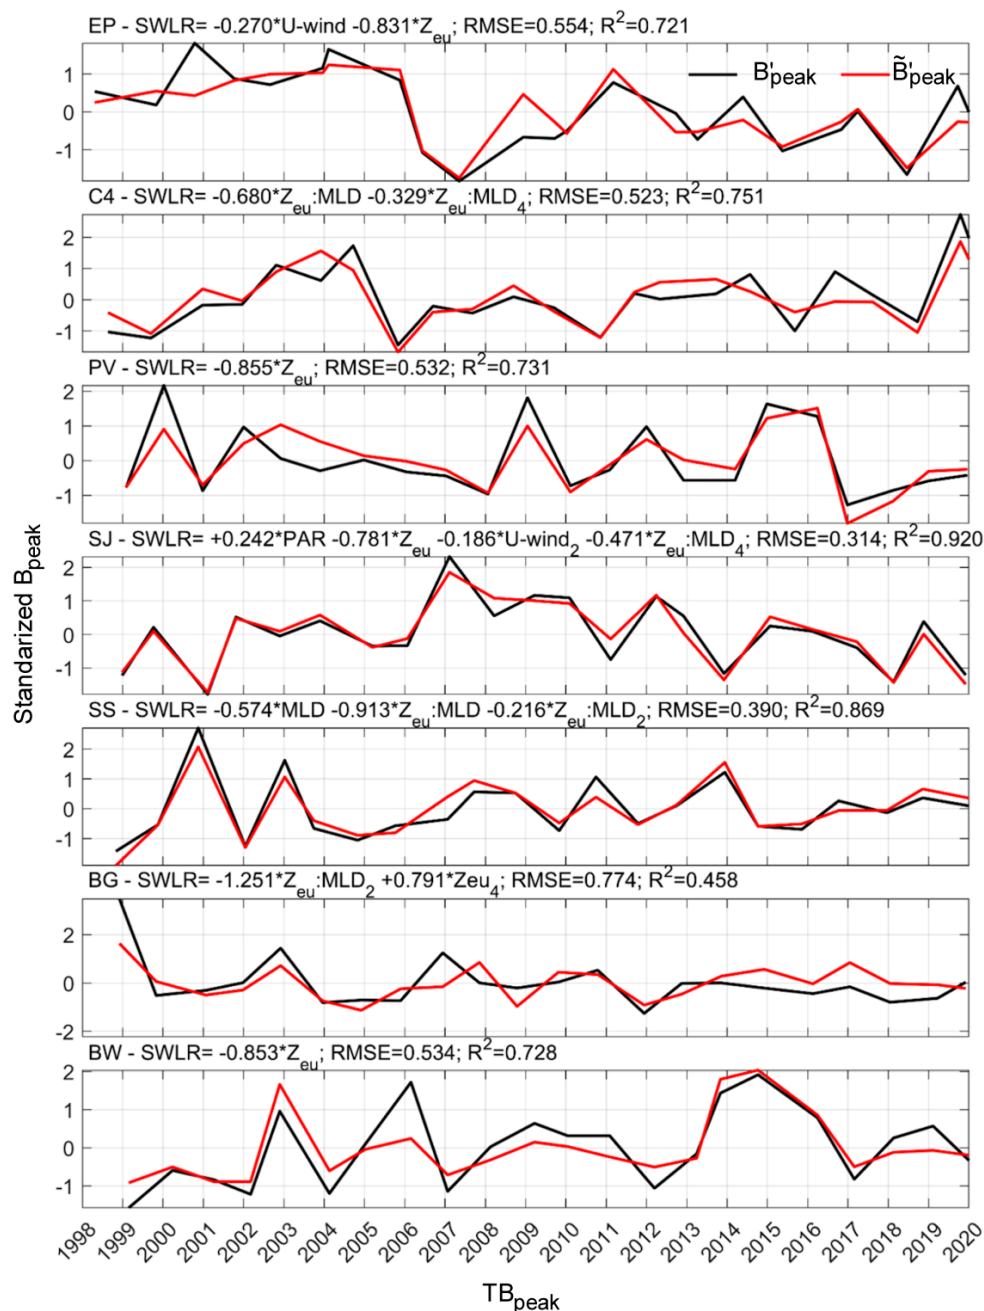

**Figure 6** Satellite (black line) and modeled (red line)  $B_{peak}$  anomalies,  $B'_{peak}$ , at each site. Model equation, root mean square error (RMSE) and coefficient of determination ( $R^2$ ) are shown in the figure.

At SS, the SWLR had a high  $R^2 \sim 0.87$  (Figure 6) with the following relevant predictors explaining  $B'_{peak}$  in order of importance:  $Z_{eu}$ :MLD, MLD, and  $Z_{eu}$ :MLD<sub>2</sub>, all of which had negative contributions. Hence at this site, located on the outer shelf immediately connected to the shelf-break front, the variations in bloom intensity were related with the interplay between light and mixing, as well as to their evolution previous to the peak. The  $B'_{peak}$  was higher when the ratio of  $Z_{eu}$ :MLD was lower, i.e., the growth of phytoplankton would shallow the  $Z_{eu}$  at the time of the peak. The same effect, though with a lower contribution,

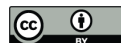

was observed regarding the values of this ratio in the two weeks previous to the peak ( $Z_{eu}:MLD_2$ ) and when MLD was relatively shallower, favoring the maintenance of the phytoplankton in the lit layer. Here the match between observed and modeled anomalies in  $B'_{peak}$  was generally good in all the years (RMSE=0.39).

At BG, the SWLR had the lowest predicting capability ( $R^2 \sim 0.46$ ) of  $B'_{peak}$  (Figure 6). Here only two predictors, negative  $Z_{eu}:MLD_2$  and positive  $Z_{eu4}$ , were relevant to explain  $B'_{peak}$ ;  $Z_{eu}:MLD_2$  being the main contributor. At this site, located at the stratified side of a circulation front in Grande Bay, the light history related to the depth of the euphotic zone previous to the bloom contributed to explain variations in  $B'_{peak}$ ; when the values of  $Z_{eu}:MLD_2$  were lower (competition between the shallowing of the mixed layer and euphotic depth also probably getting shallower due to phytoplankton growth) in the two preceding weeks to the peak, its intensity was higher; while the positive relationship with  $Z_{eu4}$  would indicate that light penetration had to increase in the month previous to the peak for it to have higher values. Note that this model was capable of explaining only 46% of the variability and showed high RSME ( $\sim 0.77$ ), suggesting that other factors not considered here are important in regulating the magnitude of the bloom.

At BW, the SWLR model showed similar performance and coefficients to the one obtained for PV, i.e.,  $R^2 \sim 0.73$  and the same single relevant predictor, the negative  $Z_{eu}$ . The inverse relationship between the depth of the euphotic layer and the intensity of the bloom peak anomaly may be related to the attenuation of light by phytoplankton producing the shallowing of  $Z_{eu}$ . A study from a field cruise conducted in summer found that at the Burdwood Bank the water column was well mixed, hence light (as shown here), as well as the action of heterotrophs seemed to regulate the bloom (Guinder et al. 2020). The RMSE  $\sim 0.55$  and in several cases the match was not so good.

**Table 3** SWLR model performance ( $R^2$  and RMSE) and predictor's coefficients at each site. Only coefficients statistically significant at the 95% confidence level are shown.

|    | $R^2$ | RMS<br>E | PAR   | $Z_{eu}$ | $Z_{eu4}$ | ML<br>D | $Z_{eu}:ML$<br>D | $Z_{eu}:ML$<br>D <sub>2</sub> | $Z_{eu}:M$<br>LD <sub>4</sub> | U-wind | U-wind <sub>2</sub> |
|----|-------|----------|-------|----------|-----------|---------|------------------|-------------------------------|-------------------------------|--------|---------------------|
| EP | 0.72  | 0.554    |       | -0.83    |           |         |                  |                               |                               | -0.27  |                     |
| C4 | 0.75  | 0.523    |       |          |           |         | -0.68            |                               | -0.329                        |        |                     |
| PV | 0.73  | 0.532    |       | -0.855   |           |         |                  |                               |                               |        |                     |
| SJ | 0.92  | 0.314    | 0.242 | -0.781   |           |         |                  |                               | -0.471                        |        | -0.186              |
| SS | 0.87  | 0.390    |       |          |           | -0.574  | -0.913           | -0.216                        |                               |        |                     |
| BG | 0.46  | 0.774    |       |          | 0.791     |         |                  | -1.251                        |                               |        |                     |
| BW | 0.73  | 0.534    |       | -0.853   |           |         |                  |                               |                               |        |                     |

#### 4 Discussion

Phytoplankton bloom initiation has historically been framed through the lens of Sverdrup's (1953) critical depth hypothesis, where stratification enables phytoplankton to accumulate when the mixed layer shoals above a critical depth. This model was expanded by Siegel et al. (2002) and Taylor and Ferrari (2011), among others, to include turbulent mixing and intermittent stratification. While such models have effectively explained bloom dynamics in large, open-ocean basins (e.g., North Atlantic, Henson et al., 2009; 2006), their application to complex shelf regions like the Argentine Shelf has remained limited. This region of the SWAO is rich in fisheries resources and relevant for CO<sub>2</sub> absorption (e.g., Angelescu and Prenschi, 1987; Bianchi et al., 2009; Martinetto et al., 2019). Satellite information and models have predicted that phytoplankton blooms maybe increasing in intensity and frequency in the overall area (Marrari et al., 2017; Dai et al., 2023). Nevertheless, the dynamics, and possible



484 drivers, of phytoplankton growth is highly heterogeneous and still not studied enough in the region (e.g., Andreo et al., 2016;  
485 D2023).

486 Our findings reinforce the relevance of light-mixing dynamics, quantified via the  $Z_{eu}:MLD$  ratio, in explaining the magnitude of  
487 blooms, but only in certain subregions. Unlike in the North Atlantic or Southern Ocean (Henson et al., 2009; Kauko et al., 2021),  
488 where clear seasonal stratification controls phenology, we observe that regions with strong tidal mixing or frontal activity, such  
489 as the San Jorge Gulf (SJ) and Valdés Peninsula (PV) sites, as well as the coastal site EP do not conform to these expectations. In  
490 these locations input of nutrients by upwelling/frontal systems or from coastal sources drive the main blooms, as has been  
491 reported for other areas of world (Ferreira et al., 2021; Krug et al., 2018; Gittings et al., 2019; Kournopoulou et al., 2024).

492 This study brings to light the presence of distinct phenological regimes across the Argentine Shelf. In the Central Shelf (CS), we  
493 document bloom initiation as early as austral autumn or winter, i.e., months before traditional stratification begins. These  
494 findings depart significantly from canonical models applied in temperate systems (Siegel et al., 2002; Racault et al., 2011) and  
495 may be related to recent observations of sub-seasonal bloom variability triggered by short-term increases in water column  
496 stability (Keerthi et al., 2021). This demonstrates the potential for intermittent stratification to facilitate early bloom formation,  
497 even when average conditions would suggest otherwise. A particular situation occurs on the coast of the CS, where blooms  
498 initiate and peak much earlier, probably due to the presence of phytoplankton species able to cope with turbidity, while still  
499 being exposed to some light due to the shallow bottom depth.

500 Further south, in the Patagonian Shelf (PS), bloom timing is more consistent with the Sverdrup framework, with peaks in spring  
501 and early summer. Yet even here, regions like the Patagonian shelf break exhibit complex behavior due to persistent nutrient  
502 input and local physical processes, similar to the Arctic and Bering Sea (Nielsen et al., 2024; Manizza et al., 2022), where  
503 phenology is shaped not only by stratification but also by ice dynamics and frontal zones. These findings resonate with the views  
504 of Sverdrup (1953) and Margalef (1978), who emphasized the role of stratification and environmental variability in shaping  
505 ecosystem dynamics and phytoplankton strategies.

506 Our study builds on previous work in the Southwestern Atlantic (Andreo et al., 2016; D2023) that described regional patterns in  
507 chlorophyll concentration and bloom occurrence. However, those studies did not analyze bloom dynamics in terms of  
508 mechanistic controls, nor did they assess the regional validity of conceptual models such as euphotic depth or mixing regulation.  
509 Here, by explicitly quantifying light and mixing controls, we show where traditional theory applies and where it fails.

510 When compared to global syntheses (Racault et al., 2011; Silva et al., 2021), our results underscore a key distinction: continental  
511 shelves feature sub-basin scale contrasts in phenology that are often obscured in basin-wide climatologies. This supports recent  
512 arguments that phenology metrics must be interpreted within their local physical and ecological contexts (Platt et al., 2005; Boyd  
513 and Doney, 2002).

514 This study echoes the view of Platt et al. (2009) and Kournopoulou et al. (2024) that phenology metrics such as bloom initiation,  
515 duration, and magnitude are powerful ecosystem indicators, but only when their regional drivers are understood. In regions like  
516 the Argentine Shelf, where physical drivers vary dramatically over small spatial scales, phenology must be framed within a  
517 region-specific, process-based context.

518 For example, while  $Z_{eu}:MLD$  predicts anomalies in  $B_{peak}$  well in parts of the Central and Northern Shelf, it fails in frontal or



tidally mixed regions, indicating the need for hybrid approaches that integrate light, mixing, nutrient input, and sub-seasonal variability (Keerthi et al., 2021; Henson et al., 2006).

Moreover, the study contributes to refining the phenoregion concept proposed by Krug et al. (2018), which classifies ocean regions based on the similarity of their seasonal phytoplankton dynamics and environmental forcing. Our findings confirm that the Argentine Shelf comprises multiple phenologically distinct regions (D2023), shaped not by latitude alone but by local oceanographic conditions. For instance, the Central Shelf supports early blooms probably driven by seasonal stratification subjected to intermittency; while in the Patagonian Shelf richer in nutrients due to its cold Sub-Antarctic waters as well as its several frontal areas, blooms develop later in summer being light their main driver. Even within each of these main regions (CS and PS) there are heterogeneities in the way that specific components of these two drivers (mixing and light) take prevalence in shaping the magnitudes of the blooms (as explained in the previous section). Recognizing this mosaic of phenoregions is essential for capturing the spatial diversity of bloom behavior and improving ecological modeling, climate projections, and the design of targeted monitoring strategies.

Climate change is expected to increase stratification and alter wind and mixing regimes, thereby influencing bloom timing and community structure (Marinov et al., 2010; Boyd and Doney, 2002). In this regard, the northern section of the shelf (CS) may experience more intense stratifications, potentially favoring smaller phytoplankton and altering trophic pathways. Meanwhile, the southern region (PS) with higher nutrient input, would be more influenced by the stronger Westerly winds (Goyal et al., 2011; Deng et al., 2022) at the same time that cloudiness may be increasing (Laken and Pallé, 2012); hence, whether phytoplankton would be really increasing in biomass, or just increasing its intracellular chlorophyll content is still a matter of speculation. Understanding how these subregions will respond differently is critical for modeling future productivity and for managing fisheries and ecosystem services in this economically important region.

## 5 Conclusions

The role of light availability, described by PAR and  $Z_{eu}$ , and MLD in shaping phytoplankton bloom dynamics across the SWAO shelf was analyzed. By examining satellite-derived Chl-a and environmental variables over a wide region, the study showed how these physical drivers influence bloom timing, intensity, and duration. The analysis addressed contrasting conditions at seven selected sites located in different phenological regions (according to D2023) that represented a diversity of hydrographic regimes, revealing key details about site-specific phytoplankton phenology.

In the Central Shelf (CS), blooms typically initiate between May and August, with coastal regions experiencing even earlier initiation. These patterns were associated with shallow MLDs, which allowed sufficient light penetration to support early phytoplankton growth, particularly when combined with relatively stable atmospheric conditions and reduced mixing. Conversely, the Patagonian Shelf (PS) exhibited delayed bloom initiation, generally occurring in September–November. This timing reflected the deeper mixed layers and colder waters characteristic of the region, which required extended periods of stratification and warming to create conditions favorable for phytoplankton growth. Additionally, nutrient-rich waters from Subantarctic origin and frontal systems supported high Chl-a during the austral summer, particularly near the shelf break. In such conditions, light penetration becomes a critical limiting factor for sustaining growth. These results indicate that light penetration,  $Z_{eu}$ , and its interplay with mixing,  $Z_{eu}$ :MLD ratio, are key determinants of bloom phenology. Sverdrup's theory explains the general expected situation for the onset with phytoplankton growth favored when light penetration exceeds mixing depth ( $Z_{eu} > \text{MLD}$ ); we found here that in most cases at the time of the peak, though the  $Z_{eu}$ :MLD was around or higher than 1 (except for EP

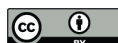

and BW), the strong phytoplankton growth would shallow  $Z_{eu}$ , and therefore negative  $Z_{eu}$  and  $Z_{eu}$ :MLD were good predictors of bloom peak anomaly. However, the predictive power of these correlations varied among the study sites. For instance, regions influenced by frontal zones or tidal mixing, such as the San Jorge Gulf and Grande Bay, exhibited more complex interactions, likely reflecting the additional contributions of localized nutrient fluxes or grazing pressure.

Seasonal cycles also showed clear geographic trends, with southern sites exhibiting longer bloom durations compared to northern regions. These findings emphasize the spatial heterogeneity of phytoplankton responses to environmental drivers, suggesting that while light and mixing are dominant factors, other local processes such as tidal energy, nutrient entrainment, and zooplankton grazing may significantly influence bloom phenology.

The study findings align with and complement those D2023, who provided a broader regional perspective on the SWAO using 24 years of satellite-derived Chl-a data. D2023 classified the SWAO into nine biogeographical regions and documented significant long-term trends, including increased phytoplankton biomass and delayed autumn blooms. These trends were attributed to climate-driven warming, MLD shoaling, and extended stratification periods. In contrast, this study centered on understanding the mechanistic roles of light availability and water column mixing in driving bloom phenology at specific locations. While D2023 emphasized environmental changes, the present study explored finer-scale dynamics, providing information on how local variations in physical drivers shape bloom timing and intensity. Notably, this study confirmed D2023's observation of delayed bloom initiation in southern regions but added detail on the variability in bloom timing within individual subregions.

The results of the present study underscore the importance of physical factors, particularly light availability and MLD, in controlling bloom phenology. The observed spatial and temporal variability points to the need of localized analyses to capture the heterogeneity of phytoplankton responses to environmental changes. By integrating satellite observations with advanced statistical methods, the utility of regional-scale data in uncovering key agents of phytoplankton blooms is demonstrated.

Future research should incorporate additional data on nutrient fluxes, tidal energy, and zooplankton grazing to account for unexplained variability in bloom dynamics. Secondary bloom dynamics and their ecological significance also warrant further investigation, particularly in the context of long-term trends (D2023). Finally, exploring the broader implications of climate-driven changes, including potential shifts in trophic interactions and ecosystem productivity, could provide useful clues into the resilience of these highly productive waters.

#### **Data availability**

The OC-CCI data can be downloaded from [https://www.oceancolour.org/thredds/catalog/cci/v6.0-release/geographic/8day/chlor\\_a/catalog.html](https://www.oceancolour.org/thredds/catalog/cci/v6.0-release/geographic/8day/chlor_a/catalog.html), the Globcolour data from <https://hermes.acri.fr/index.php?class=archive>, the GLORYS12v1 data from [https://data.marine.copernicus.eu/product/GLOBAL\\_MULTIYEAR\\_PHY\\_001\\_030/services](https://data.marine.copernicus.eu/product/GLOBAL_MULTIYEAR_PHY_001_030/services), and the ERA5 reanalysis data from <https://cds.climate.copernicus.eu/datasets/reanalysis-era5-single-levels?tab=download>. The results of this study, as well as the satellite and in-situ data used in producing the various figures, are available from the authors upon reasonable request.

#### **Author contributions**

A. Dogliotti, R. Maenza, M.L. Clara, V.A. Lutz, and R. Frouin jointly contributed to the conceptualization and design of the





study. All authors participated equally in data analysis, interpretation of results, and drafting and revising the manuscript. A. Dogliotti and R. Maenza prepared the figures including data processing, visualization, and layout. All authors reviewed and approved the final version of the manuscript.

#### Competing interests

The authors declare that they have no conflict of interest.

#### Acknowledgments

This work was funded by the Agencia Nacional de Promoción de la Investigación (ANPCyT), PICT-2019 N° 2178. The authors thank the Climate Change Initiative (CCI) Project, Globcolour and CooperNICUS groups for the distribution of satellite merged products and modeled data. We acknowledge Instituto Nacional de Investigación y Desarrollo Pesquero (INIDEP) for the use of  $Z_{eu}$  data from the EPEA time series (DiPlaMCC program). R. Frouin was supported by the National Aeronautics and Space Administration (NASA) under grants 80NSSC19K1194 and 80NSSC24K13.

#### References

- Acha, E. M., Iribarne, O. O., and Piola, A. R.: The Patagonian Shelfbreak Front, Aquatic Ecology Series vol 13, <https://doi.org/10.1007/978-3-031-71190-9>, 2024.
- Acha, E. M., Mianzan, H. W., Guerrero, R. A., Favero, M., and Bava, J.: Marine fronts at the continental shelves of austral South America: Physical and ecological processes, *J. Mar. Syst.*, 44(1–2), 83–105, <https://doi.org/10.1016/j.jmarsys.2003.09.005>, 2004.
- Acha, E. M., Ehrlich, M. D., Muelbert, J. H., Pájaro, M., Bruno, D., Machinandiarena, L., and Cadaveira, L.: “Ichthyoplankton associated to the frontal regions of the southwestern atlantic,” in Plankton ecology of the southwestern Atlantic: From the subtropical to the subantarctic realm. Eds. Hoffmeyer M. S., Sabatini M. E., Brandini F. P., Calliari D. L., Santinelli N. H. (Berlin: Springer International Publishing), 219–246, [https://doi.org/10.1007/978-3-319-77869-3\\_11](https://doi.org/10.1007/978-3-319-77869-3_11), 2018.
- Aiken, L.S.: Multiple regression: Testing and interpreting interactions, ISBN: 9780761907121, Sage Publications, Inc., 1991.
- Akselman R.: Estudios ecológicos en el Golfo San Jorge y adyacencias (Atlántico Sudoccidental). Distribución, abundancia y variación estacional del fitoplancton en relación a factores físico-químicos y a la dinámica hidrográfica, PhD Thesis, Universidad de Buenos Aires, Argentina, 234 pp., 1996.
- Andreo, V. C., Dogliotti, A. I., and Tauro, C. B.: Remote sensing of phytoplankton blooms in the Continental Shelf and shelf-break of Argentina: spatio-temporal changes and phenology, *IEEE J. Sel. Top. Appl. Earth Obs. Remote Sens.*, vol. 9, 12: 5315–5324, <https://doi.org/10.1109/JSTARS.2016.2585142>, 2016.
- Angelescu, V. and Prenski, L. B.: Ecología trófica de la Merluza común del Mar Argentino (Merlucciidae, Merluccius hubbsi). Parte 2. Dinámica de la alimentación analizada sobre la base de las condiciones ambientales, la estructura y las evaluaciones de los efectivos en su área de distribución, Serie Contribuciones del INIDEP 561, 1987.
- Behrenfeld, M. J. and Falkowski, P. G.: Photosynthetic rates derived from satellite-based chlorophyll concentration, *Limnol. Oceanogr.*, 42(1), 1–20, <https://doi.org/10.4319/lo.1997.42.1.0001>, 1997.
- Behrenfeld, M. J., Boss, E., Siegel, D. A., and Shea, D. M. (2005). Carbon-based ocean productivity and phytoplankton physiology from space, *Global Biogeochem. Cycles*, 19(1), <https://doi.org/10.1029/2004GB002299>, 2005.
- Behrenfeld, M. J., O'Malley, R. T., Siegel, D. A., McClain, C. R., Sarmiento, J. L., Feldman, G. C., et al.: Climate-driven trends



- 627 in contemporary ocean productivity, *Nature*, 444 (7120), 752-755, <https://doi.org/10.1038/nature05317>, 2006.
- 628 Bertuche, D., Fischbach, C., Roux, A., Fernández, M., and Piñero, R.: Langostino (*Pleoticus muelleri*). In: Síntesis del estado de  
629 las Pesquerías Marítimas Argentinas y de la Cuenca del Plata. Años 1997–1998, con la actualización de 1999 (eds Bezzi  
630 S, Akselman R, Boschi EE), INIDEP, Mar del Plata, Argentina, 179–190, 2000.
- 631 Bianchi, A. A., Ruiz Pino, D., Isbert Perlender, H. G., Piola, A. R., Osiroff, A. P., Segura, V., Lutz, V., Luz Clara, M., and  
632 Balestrini, C. F.: Annual balance and seasonal variability of sea-air CO<sub>2</sub> fluxes in the Patagonian Sea: Their relationship  
633 with fronts and chlorophyll distribution. *J. Geophys. Res.* 114, C03018, <https://doi.org/10.1029/2008JC004854>, 2009.
- 634 Bogazzi, E., Baldoni, A., Rivas, A. L., Martos, P., Reta, R., Orensanz, J. M., Lasta, M., Arciprete, P., and Werner, F.: Spatial  
635 correspondence between areas of concentration of Patagonian Scallop (*Zygochlamys patagonica*) and frontal systems in  
636 the Southwestern Atlantic, *Fish Oceanogr* 14: 359–376, <https://doi.org/10.1111/j.1365-2419.2005.00340.x>, 2005.
- 637 Boyd, P. W. and Doney, S. C.: Modeling regional responses by marine pelagic ecosystems to global climate change. *Geophys.*  
638 *Res. Lett.*, 29(16), 1806, <https://doi.org/10.1029/2001GL014130>, 2002.
- 639 Carreto, J. I., Benavides, H. R., Negri, R. M., and Glorioso, P. D.: Toxic red-tide in the Argentine Sea. Phytoplankton  
640 distribution and survival of the toxic dinoflagellate *Gonyaulax excavate* in a frontal area, *J. Plankton Res.*, 8, 15–28,  
641 <https://doi.org/10.1093/plankt/8.1.15>, 1986.
- 642 Carreto, J. I., Carignan, M. O., Montoya, N. G., Cozzolino, E., and Akselman, R.: Mycosporine-like amino acids and  
643 xanthophyll-cycle pigments favour a massive spring bloom development of the dinoflagellate *Prorocentrum minimum*  
644 in Grande Bay (Argentina), an ozone hole affected area, *J. Mar. Syst.*, 178:15-28,  
645 <https://doi.org/10.1016/j.jmarsys.2017.10.004>, 2018.
- 646 Carreto, J. I., Carignan, M. O., Montoya, N. G., and Cucchi Colleoni, A.D.: Ecología del fitoplancton en los sistemas frontales  
647 del Mar Argentino. In: Carreto, J.I., Bremec, C. (Eds.). El Mar Argentino y sus recursos pesqueros. Tomo 5. El  
648 ecosistema marino, Publicaciones especiales del Instituto Nacional de Investigación y Desarrollo Pesquero, Mar del  
649 Plata 11-31, 2007.
- 650 Carreto, J. I., Lutz, V. A., Carignan, M. O., Cucchi Colleoni, A. D., and De Marco, S.G.: Hydrography and chlorophyll a in a  
651 transect from the coast to the shelf-break in the Argentinian Sea, *Cont. Shelf Res.*, 15: 315-336,  
652 [https://doi.org/10.1016/0278-4343\(94\)E0001-3](https://doi.org/10.1016/0278-4343(94)E0001-3), 1995.
- 653 Cousseau, M. B. and Perrota, R. G.: Peces marinos de Argentina. Biología, distribución, pesca. Publicaciones Especiales  
654 INIDEP, Mar del Plata, 167 pp., 2004.
- 655 Cullen, J.: Subsurface chlorophyll maximum layers: Enduring enigma or mystery solved?, *Annu Rev Mar Sci*, 7: 207-239,  
656 <https://doi.org/10.1146/annurev-marine-010213-135111>, 2015.
- 657 Cushing, D. H.: A difference in structure between ecosystems in strongly stratified waters and in those that are only weakly  
658 stratified, *J. Plankton Res.* 11: 1-13, <https://doi.org/10.1093/plankt/11.1.1>, 1989.
- 659 Dai, Y., Yang, S., Zhao, D., Hu, C., Xu, W., Anderson, D. M., Li, Y., Song, X.-P., Boyce, D. G., Gibson, L., Zheng, C., and Feng,  
660 L.: Coastal phytoplankton blooms expand and intensify in the 21st century, *Nature*, 619, 603-609,  
661 <https://doi.org/10.1038/s41586-023-05760-y>, 2023.
- 662 Delgado, A. L., Hernández-Carrasco, I., Combes, V., Font-Muñoz, J., Pratolongo, P. D., and Basterretxea, G.: Patterns and  
663 trends in Chlorophyll-a concentration and phytoplankton phenology in the biogeographical regions of Southwestern  
664 Atlantic, *J. Geophys. Res.: Oceans*, 128, e2023JC019865, <https://doi.org/10.1029/2023JC019865>, 2023.
- 665 Deng, K., Azorin-Molina, C., Yang S., Hu, C., Zhang, G., Minola, L., and Chen, D.: Changes of Southern Hemisphere westerlies  
666 in the future warming climate, *Atmos. Res.*, Vol 270, 106040, <https://doi.org/10.1016/j.atmosres.2022.106040>, 2022.



- 667 Dogliotti, A. I., Lutz, V. A., and Segura, V.: Estimation of primary production in the southern Argentine continental shelf and  
668 shelf-break regions using field and remote sensing data, *Rem. Sens. Environ.*, 140: 497-508,  
669 <https://doi.org/10.1016/j.rse.2013.09.021>, 2014.
- 670 Falkowski, P. G., Barber, R. T., and Smetacek, V.: Biogeochemical controls and feedbacks on ocean primary production,  
671 *Science*, 281(5374), 200-206, <https://doi.org/10.1126/science.281.5374.200>, 1998.
- 672 Ferreira, A. S., Visser, A. W., MacKenzie, B. R., and Payne, M. R.: Accuracy and precision in the calculation of phenology  
673 metrics, *J. Geophys. Res. Oceans*, 119, 8438-8453, <https://doi.org/10.1002/2014JC010323>, 2014.
- 674 Ferreira, A., Brotas, V., Palma, C., Borges, C., and Brito, A. C.: Assessing Phytoplankton Bloom Phenology in Upwelling-  
675 Influenced Regions Using Ocean Color Remote Sensing, *Remote Sens.*, 13, 675, <https://doi.org/10.3390/rs13040675>,  
676 2021.
- 677 Forbes, M. C. and Garrafo, Z. A.: A note on the mean seasonal transport on the Argentinian Shelf, *J. Geophys. Res.*, 93, pp.  
678 2311-2319, <https://doi.org/10.1029/JC093iC03p02311>, 1988.
- 679 Frouin, R., Franz, B. A., and Werdell, P. J.: “The SeaWiFS PAR Product,” in Algorithm Updates for the Fourth SeaWiFS Data  
680 Reprocessing, NASA Tech. Memo. 2003-206892, Editors S. B. Hooker, and E. R. Firestone (Greenbelt, Maryland:  
681 NASA Goddard Space Flight Center), Vol. 22, 46–50, 2023.
- 682 Garzoli, S. L. and Garraffo, Z.: Transports, frontal motions and eddies at the Brazil-Malvinas currents confluence. *Deep Sea Res.*  
683 *A.: Oceanogr. Res. Pap.*, Vol. 36(5), 1989, 681-703 [https://doi.org/10.1016/0198-0149\(89\)90145-3](https://doi.org/10.1016/0198-0149(89)90145-3), 1989.
- 684 Giaccardi, M. and Caloni, N.: Frente Valdés: Línea de Base Ambiental y Socioeconómica. Documento del Ministerio de  
685 Ambiente y Desarrollo Sostenible, FAO y GEF. Proyecto “Fortalecimiento de la Gestión y Protección de la  
686 Biodiversidad Costero Marina en Áreas Ecológicas clave y la Aplicación del Enfoque Ecosistémico de la Pesca (EEP)”  
687 (Argentina). Pág. 185, [https://www.argentina.gob.ar/sites/default/files/2018/10/2022-1434\\_frentevaldes\\_0.pdf](https://www.argentina.gob.ar/sites/default/files/2018/10/2022-1434_frentevaldes_0.pdf), 2022.
- 688 Gittings, J. A., Raitsos, D. E., Kheireddine, M., Racault, M. F., Claustre, H., and Hoteit, I.: Evaluating tropical phytoplankton  
689 phenology metrics using contemporary tools, *Sci. Rep.*, 9, 674, <https://doi.org/10.1038/s41598-018-37370-4>, 2019.
- 690 Glorioso, P. D.: Temperature distribution related to shelf-sea fronts on the Patagonian Shelf, *Cont. Shelf Res.*, 7, 27-34,  
691 [https://doi.org/10.1016/0278-4343\(87\)90061-6](https://doi.org/10.1016/0278-4343(87)90061-6), 1987.
- 692 Glorioso, P. D. and Flather, R. A.: The Patagonian Shelf tides, *Prog. Oceanogr.*, 40, 1-4, 263-283,  
693 [https://doi.org/10.1016/S0079-6611\(98\)00004-4](https://doi.org/10.1016/S0079-6611(98)00004-4), 1997.
- 694 González-Reyes, A., Christie, D. A., Schneider-Valenzuela, I., Venegas-González, A., Muñoz, A. A., Hadad, M., et al.: Recent  
695 multispecies tree-growth decline reveals a severe aridity change in Mediterranean Chile, *Environ. Res. Lett.*, 19(6),  
696 064046, <https://doi.org/10.1088/1748-9326/ad4049>, 2004.
- 697 Goyal R., Gupta, A. S., Jucker, M., and England, M. H.: Historical and projected changes in the Southern Hemisphere Surface  
698 westerlies, *Geophys. Res. Lett.*, 48, <https://doi.org/10.1029/2020GL090849>, 2021.
- 699 Guerrero, R.A. and Piola A.R.: Masas de agua en la plataforma continental. En: El Mar Argentino y sus recursos pesqueros.  
700 Antecedentes históricos de las exploraciones en el mar y las características ambientales, Vol. 1, Ed: E. E. Boschi,  
701 Instituto Nacional de Investigaciones y Desarrollo Pesquero. Mar del Plata, Argentina, 107-118, 1997.
- 702 Guinder, V. A., Malits A., Ferronato C., Krock B., Garzón-Cardona J., and Martínez A.: Microbial plankton configuration in the  
703 epipelagic realm from the Beagle Channel to the Burdwood Bank, a Marine Protected Area in Sub-Antarctic waters,  
704 *PLoS ONE* 15(5): e0233156, <https://doi.org/10.1371/journal.pone.0233156>, 2020.
- 705 Henson, S. A., Dunne, J. P., and Sarmiento, J. L.: Decadal variability in North Atlantic phytoplankton blooms, *J. Geophys. Res.*  
706 *Oceans*, 114(C4), <https://doi.org/10.1029/2008JC005139>, 2009.



- 707 Henson, S. A., Robinson, I., Allen, J. T., and Waniek, J. J.: Effect of meteorological conditions on interannual variability in  
708 timing and magnitude of the spring bloom in the Irminger Basin, North Atlantic, *Deep-Sea Res. Part I*, 53(10), 1601–  
709 1615, <https://doi.org/10.1016/j.dsr.2006.07.009>, 2006.
- 710 Höfllich, O.: Climate of the South Atlantic, H. Van Loon (Ed.), Climate of the oceans, Elsevier, Amsterdam, pp. 1-191, 1984.
- 711 Kauko, H. M., Hattermann, T., Ryan-Keogh, T., Singh, A., de Steur, L., Fransson, A., Chierici, M., Falkenhaug, T.,  
712 Hallfredsson, E. H., Bratbak, G., Tsagaraki, T., Berge, T., Zhou, Q., and Moreau, S.: Phenology and environmental  
713 control of phytoplankton blooms in the Kong Håkon VII Hav in the Southern Ocean, *Front. Mar. Sci.*, 8, 623856,  
714 <https://doi.org/10.3389/fmars.2021.623856>, 2021.
- 715 Keerthi, M. G., Lévy, M., and Aumont, O.: Intermittency in phytoplankton bloom triggered by modulations in vertical stability.  
716 *Sci. Rep.*, 11, 1133, <https://doi.org/10.1038/s41598-020-80331-z>, 2021.
- 717 Kournopoulou, A., Kikaki, K., Varkitzi, I., Psarra, S., Assimakopoulou, G., Karantzas, K., and Raitsos, D. E.: Atlas of  
718 phytoplankton phenology indices in selected Eastern Mediterranean marine ecosystems. *Sci. Rep.*, 14, 1236,  
719 <https://doi.org/10.1038/s41598-024-60792-2>, 2024.
- 720 Krug, L. A., Platt, T., Sathyendranath, S., and Barbosa, A. B.: Patterns and drivers of phytoplankton phenology off SW Iberia: a  
721 phenoregion based perspective, *Prog. Oceanogr.*, 165: 233-256, <https://doi.org/10.1016/j.pocean.2018.06.010>, 2018.
- 722 Laken, B. A. and Pallé, E.: 2012: Understanding sudden changes in cloud amount: The Southern Annular Mode and South  
723 American weather fluctuations, *J. Geophys. Res.*, 117, D13103, <https://doi.org/10.1029/2012JD017626>, 2012.
- 724 Lellouche J.-M., Grenier, E., Bourdalle-Badie, R., Garric, G., Angelique, M., Marie, D., et al.: The Copernicus global 1/12  
725 degree oceanic and sea ice GLORYS12 reanalysis, *Front. Earth Sci.*, 9, 698876,  
726 <https://doi.org/10.3389/feart.2021.698876>, 2021.
- 727 Li, Y., Li, J., Zhao, Y., Lei, M., Zhao, Y., Jian, B., et al.: Long-term variation of boundary layer height and possible contribution  
728 factors: A global analysis, *Sci. Total Environ.*, 796, 148950, <https://doi.org/10.1016/j.scitotenv.2021.148950>, 2021.
- 729 Lucas, A. J., Guerrero, R. A., Mianzan, H. W., Acha, E. M., and Lasta, C. A.: Coastal oceanographic regimes of the Northern  
730 Argentine Continental Shelf (34–43°S), *Estuar. Coast. Shelf Sci.*, 65: 405–420,  
731 <https://doi.org/10.1016/j.ecss.2005.06.015>, 2005.
- 732 Luz Clara, M.: Estimación de los flujos mar-atmósfera de CO<sub>2</sub> y la variabilidad de la clorofila-a en el Mar Argentino. Lic. en  
733 Oceanografía. Bch. Thesis. Facultad de Ciencias Exactas y Naturales, Universidad de Buenos Aires, Argentina,  
734 <https://aquadocs.org/items/03aee2b1-4308-461d-a170-985222d9393>, 2008.
- 735 Luz Clara, M., Simionato, C. G., D'Onofrio, E., Fiore, M., and Moreira, D.: Variability of tidal constants in the Río de la Plata  
736 estuary associated to the natural cycles of the runoff, *Estuar. Coast. Shelf Sci.*, 148, 85-96,  
737 <https://doi.org/10.1016/j.ecss.2014.07.002>, 2014.
- 738 Luz Clara, M., Simionato, C. G., D'Onofrio, E., and Moreira, D.: Future sea level rise and changes on tides in the Patagonian  
739 Continental Shelf, *J. Coast. Res.*, 31(3), 519-535, <https://doi.org/10.2112/JCOASTRES-D-13-00127.1>, 2015.
- 740 Lutz, V. A. and Carreto, J. I.: A new spectrofluorometric method for the determination of chlorophylls and degradation products  
741 and its application in two frontal areas of the Argentine Sea, *Cont. Shelf Res.*, 11: 433-451,  
742 [https://doi.org/10.1016/0278-4343\(91\)90052-8](https://doi.org/10.1016/0278-4343(91)90052-8), 1991.
- 743 Lutz, V. A., Subramaniam, A., Negri, R. M., Silva, R. I., and Carreto, J. I.: Annual variations in bio-optical properties at the  
744 'Estación Permanente de Estudios Ambientales (EPEA)' coastal station, Argentina, *Cont. Shelf Res.* 26:1093-1112,  
745 <https://doi.org/10.1016/j.csr.2006.02.012>, 2006.
- 746 Manizza, M., Carroll, D., and Menemenlis, D.: Modeling the recent changes of phytoplankton blooms dynamics in the Arctic



- 747 Ocean, *J. Geophys. Res. Oceans*, 127(7), e2022JC019152, <https://doi.org/10.1029/2022JC019152>, 2022.
- 748 Marinov, I., Doney, S. C., and Lima, I.: Response of ocean phytoplankton community structure to climate change over the 21st  
749 century: partitioning the effects of nutrients, temperature and light. *Biogeosciences*, 7, 3941-3959.  
750 <https://doi.org/10.5194/bg-7-3941-2010>, 2010.
- 751 Margalef, R.: Life-forms of phytoplankton as survival alternatives in an unstable environment, *Oceanol. Acta*, 1(4), 493-509,  
752 1978.
- 753 Marrari, M., Piola, A. R., and Valla, D.: Variability and 20-year trends in satellite-derived surface chlorophyll concentrations in  
754 large marine ecosystems around South and Western Central America, *Front. in Mar. Sci.*, 4(372),  
755 <https://doi.org/10.3389/fmars.2017.00372>, 2017.
- 756 Martín, J., Schloss, I., Malits, A., Flores Melo, X., Iachetti, C., Latorre, M., et al.: El Banco Burdwood: Un oasis sumergido en  
757 el Atlántico Sur, La Lupa, Colección Fueguina De divulgación científica, (16), 10-13, 2020.
- 758 Martinetto, P. M. R., Alemany, D., Botto, F., Mastrángelo, M., Falabella, V., Acha, E. M., Antón, G., Bianchi, A., Campagna, C.,  
759 Cañete, G., Filippo, P., Iribarne, O. O., Latorre, P., Martínez, P., Negri, R., Piola, A. R., Romero, S. I., Santos, D., and  
760 Saraceno, M.: Linking the scientific knowledge on marine frontal systems with ecosystem services. Royal Swedish  
761 Acad Sciences, *Ambio*, 49: 541-556, (<https://doi.org/10.1007/s13280-019-01222-w>), 2019.
- 762 Martos, P. and Piccolo, M.C. (1988). Hydrography of the Argentine Continental Shelf between 38°S and 42°S, *Cont. Shelf Res.*,  
763 8, 1043-1056, [https://doi.org/10.1016/0278-4343\(88\)90038-6](https://doi.org/10.1016/0278-4343(88)90038-6).
- 764 Matano, R. P., Palma, E. D., and Piola, A. R.: The influence of the Brazil and Malvinas Currents on the Southwestern Atlantic  
765 Shelf circulation, *Ocean Sci.*, 6, 983–995, <https://doi.org/10.5194/os-6-983-2010>, 2010.
- 766 Moore, C. M., Mills, M. M., Arrigo, K. R., Berman-Frank, I., Bopp, L., Boyd, P. W., et al.: Processes and patterns of oceanic  
767 nutrient limitation, *Nature Geosci.*, 6(9), 701-710, <https://doi.org/10.1038/ngeo1765>, 2013.
- 768 Moreira, D., Simionato, C. G., and Dragani, W.: Modeling ocean tides and their energetics in the North Patagonia Gulfs of  
769 Argentina, *J. Coast. Res.*, 27(1), 87-102, <https://doi.org/10.2112/JCOASTRES-D-09-00055.1>, 2011.
- 770 Morel, A., Huot, Y., Gentili, B., Werdell, P. J., Hooker, S. B., and Franz, B.A.: Examining the consistency of products derived  
771 from various ocean color sensors in open ocean (case 1) waters in the perspective of a multi-sensor approach. *Rem.*  
772 *Sens. Environ.*, 111, 69-88, <https://doi.org/10.1016/j.rse.2007.03.012>, 2007.
- 773 Moriondo Danovaro, P., Fernández, M., Fischbach, C., de la Garza, J., and Bertuche D.: Síntesis de los aspectos biológico-  
774 pesqueros del langostino (*Pleoticus muelleri*, Decapoda, Solenoceridae), In: El mar Argentino y sus recursos pesqueros  
775 (ed Boschi EE), Tomo 6, INIDEP, Mar del Plata, 95-110, 2016.
- 776 Nielsen, J. M., Sigler, M. F., Eisner, L. B., Watson, J. T., Rogers, L. A., Bell, S. W., Pelland, N., Mordy, C. W., Cheng, W.,  
777 Kivva, K., Osborne, S., and Stabeno, P.: Spring phytoplankton bloom phenology during recent climate warming on the  
778 Bering Sea shelf, *Progr. Oceanogr.*, 214, 103176, <https://doi.org/10.1016/j.pocean.2023.103176>, 2024.
- 779 Piola, A. R. and Matano, R. P.: The South Atlantic Western Boundary Currents Brazil/Falkland (Malvinas) Currents,  
780 Encyclopedia of Ocean Sciences, edited by: Steele, J. M., Thorpe, S. A., and Turekian, K. K., Academic Press, 1, 340–  
781 349, 2001.
- 782 Piola, A. R., et al.: Physical oceanography of the SW Atlantic shelf: A review, In: Hoffmeyer, M., Sabatini, M., Brandini, F.,  
783 Calliari, D., Santinelli, N. (eds) Plankton Ecology of the Southwestern Atlantic, Springer Nature,  
784 <https://doi.org/10.1007/978-3-319-77869-3>, 2018.
- 785 Platt, T.: Primary production of the ocean water column as a function of surface light intensity: Algorithms for remote sensing,  
786 *Deep Sea Res. A: Oceanogr. Res. Pap.*, 33(2), 149-163, [https://doi.org/10.1016/0198-0149\(86\)90115-9](https://doi.org/10.1016/0198-0149(86)90115-9), 1986.



- 787 Platt, T., Bouman, H., Devred, E., Fuentes-Yaco, C., and Sathyendranath, S.: Physical forcing and phytoplankton distributions,  
788 *Sci. Mar.*, 69: 55-73, <https://doi.org/10.3989/scimar.2005.69s155>, 2005.
- 789 Platt, T. and Sathyendranath, S.: Ecological indicators for the pelagic zone of the ocean from remote sensing, *Rem. Sens.*  
790 *Environ.*, 112: 3426-3436, <https://doi.org/10.1016/j.rse.2007.10.016>, 2008.
- 791 Platt, T., White III, G. N., Zhai, L., Sathyendranath, S., and Roy, S.: The phenology of phytoplankton blooms: Ecosystem  
792 indicators from remote sensing, *Ecol. Model.*, 221(11), 1574-1587, <https://doi.org/10.1016/j.ecolmodel.2008.11.022>,  
793 2009.
- 794 Racault, M.-F., Le Quere, C., Buitenhuis, E., Sathyendranath, S., and Platt, T.: Phytoplankton phenology in the global ocean,  
795 *Ecol. Indic.*, 14(1), 152-163, <https://doi.org/10.1016/j.ecolind.2011.07.010>, 2012.
- 796 Racault, M., Sathyendranath, S., and Platt, T.: Impact of missing data on the estimation of ecological indicators from satellite  
797 ocean-colour time-series, *Rem. Sens. Environ.*, 152, 15-28, <http://dx.doi.org/10.1016/j.rse.2014.05.016>, 2014.
- 798 Richardson, K., and Bendtsen, J.: Vertical distribution of phytoplankton and primary production in relation to nutricline depth in  
799 the open ocean, *Mar. Ecol. Prog. Ser.*, 620: 33-46, <https://doi.org/10.3354/meps12960>, 2019.
- 800 Rivas, A. L., and Pisoni, J. P.: Identification, characteristics and seasonal evolution of surface thermal fronts in the Argentinean  
801 Continental Shelf, *J. Mar. Syst.*, 79(1-2), 134-143, <https://doi.org/10.1016/j.jmarsys.2009.07.008>, 2010.
- 802 Ruiz, M. G., Lutz, V., Segura, V., Berghoff, C., and Negri, R.: The color of EPEA: Variability in the bio-optical properties in the  
803 period 2000-2017, *Mar. Fish. Sci.*, 33: 205-225, <https://doi.org/10.47193/mafis.3322020301105>, 2020.
- 804 Ruiz-Etcheverry, L.A., Saraceno, M., Piola, A. R. and Strub, P.T.: Sea level anomaly on the Patagonian continental shelf: trends,  
805 annual patterns and geostrophic flows, *J. Geophys. Res. Oceans*, 121, pp. 2733-2754,  
806 <https://doi.org/10.1002/2015JC011265>, 2016.
- 807 Sabatini, M. and Martos, P.: Mesozooplankton features in a frontal area off northern Patagonia (Argentina) during spring 1995  
808 and 1998, *Sci Mar.*, 66: 215-232, <https://doi.org/10.3989/scimar.2002.66n3215>, 2002.
- 809 Sabatini, M., Reta, R., and Matano, R.: Circulation and zooplankton biomass distribution over the southern Patagonian shelf  
810 during late summer, *Cont. Shelf Res.*, 24, 1359– 1373, <https://doi.org/10.1016/j.csr.2004.03.014>, 2004.
- 811 Sathyendranath, S., Brewin, R. J., Brockmann, C., Brotas, V., Calton, B., Chuprin, A., et al.: An ocean-colour time series for use  
812 in climate studies: the experience of the ocean-colour climate change initiative (OC-CCI), *Sensors* 19 (19), 4285,  
813 <https://doi.org/10.3390/s19194285>, 2019.
- 814 Segura, V., Lutz, V. A., Dogliotti, A. I., Silva, R., Negri, R., Akselman, R., and Benavides, H. (2013). Phytoplankton Functional  
815 Types and primary production in the Argentine Sea, *Mar. Ecol. Prog. Ser.*, 491: 15-31,  
816 <https://doi.org/10.3354/meps10461>, 2013.
- 817 Segura, V., Silva, R., Luz Clara, M., Martos, P., Cozzolino, E., and Lutz, V.: Primary production and plankton assemblages in  
818 the fisheries ground around San Jorge Gulf (Patagonia), *Plankton Benthos Res.*, 16(1): 24-39,  
819 <https://doi.org/10.3800/pbr.16.24>, 2021.
- 820 Siegel, D. A., Doney, S. C., and Yoder, J. A.: The North Atlantic Spring Phytoplankton Bloom and Sverdrup's Critical Depth  
821 Hypothesis, *Science*, 296(5568), 730-733, <https://doi.org/10.1126/science.1069174>, 2002.
- 822 Silva, E., Counillon, F., Brajard, J., Korosov, A., Pettersson, L. H., Samuelsen, A., and Keenlyside, N.: Twenty-one years of  
823 phytoplankton bloom phenology in the Barents, Norwegian, and North Seas, *Front. Mar. Sci.*, 8, 746327,  
824 <https://doi.org/10.3389/fmars.2021.746327>, 2021.
- 825 Silva, R. I., Negri, R. M., and Lutz, V.: Summer succession of ultraphytoplankton at the EPEA coastal station (Northern  
826 Argentina), *J. Plankton Res.*, 31: 447-458, <https://doi.org/10.1093/plankt/fbn128>, 2009.



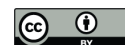

- 827 Strub, P. T., James, C., Combes, V., Matano, R. P., Piola, A. R., Palma, E. D., et al.: Altimeter-derived seasonal circulation on  
828 the southwest Atlantic shelf: 27°–43°S, *J. Geophys. Res. Oceans*, <https://doi.org/10.1002/2015JC010769>, 2015.
- 829 Sverdrup, H. U.: On conditions for the vernal blooming of phytoplankton, *Journal du Conseil*, 18(3), 287–295, 1953.
- 830 Taylor, J. R. and Ferrari, R.: Shutdown of turbulent convection as a new criterion for the onset of spring phytoplankton blooms,  
831 *Limnol. Oceanogr.*, 56(6), 2293–2307, <https://doi.org/10.4319/lo.2011.56.6.2293>, 2011.
- 832 Torres, F. L. R., Kuki, C. A. C., Reboita, M. S., Lima, L. M. M., Lima, J. W. M., and de Queiroz, A. R.: Refining Seasonal  
833 Precipitation Forecast in Brazil Using Simple Data-Driven Techniques and Climate Indices, *Revista Brasileira de*  
834 *Meteorologia*, v. 39, e39240052, <https://doi.org/10.1590/0102-77863910052>, 2024.
- 835 Trenberth, K. E.: Storm tracks in the Southern Hemisphere, *J. Atmos. Sci.*, 48, 2159–2178, [https://doi.org/10.1175/1520-0469\(1991\)048<2159:STITSH>2.0.CO;2](https://doi.org/10.1175/1520-0469(1991)048<2159:STITSH>2.0.CO;2), 1991.
- 836  
837 Vera, C. S., Vigliarolo, P. K., and Berbery, E. H.: Cold season synoptic-scale waves over subtropical South America, *Mon. Weather Rev.*, p. 2, [https://doi.org/10.1175/1520-0493\(2002\)130<0684:CSSSWO>2.0.CO;2](https://doi.org/10.1175/1520-0493(2002)130<0684:CSSSWO>2.0.CO;2), 2002.
- 838  
839 Yang, C., Wang, N., and Wang, S.: A comparison of three predictor selection methods for statistical downscaling, *Int. J. Climatol.*, 37, 1238–1249, <https://doi.org/10.1002/joc.4772>, 2017.
- 840  
841 Yentsch, C. S., and Phinney, D. A.: A bridge between ocean optics and microbial ecology, *Limnol. Oceanogr.*, 34: 1694–1705,  
842 <https://doi.org/10.4319/lo.1989.34.8.1694>, 1989.
- 843 Yu, S., Bai, Y., He, X., Li, T., and Gong, F.: A new merged dataset of global ocean chlorophyll-a concentration for better trend  
844 detection. *Front. Mar. Sci.*, 10, 48, <https://doi.org/10.3389/fmars.2023.1051619>, 2023.
